# Supplementary material for: Artifact-free whole-slide imaging with structured illumination microscopy and Bayesian image reconstruction
Source: PubMed Central journal article supplement (PMC7155289; doi:10.1093/gigascience/giaa035), 2020-04-14
Supplement: giaa035_giga-d-19-00306_original_submission.pdf [file giaa035_giga-d-19-00306_original_submission.pdf]

# GigaScience

## Artifact-free whole-slide imaging with structured illumination microscopy and Bayesian image reconstruction --Manuscript Draft--

|                                                                               |                                                                                                                                                                                                                                                                                                                                                                                                                                                                                                                                                                                                                                                                                                                                                                                                                                                                                                                                                                                                                                                                                                                                                                                                                                                                                                                                                               |                |
|-------------------------------------------------------------------------------|---------------------------------------------------------------------------------------------------------------------------------------------------------------------------------------------------------------------------------------------------------------------------------------------------------------------------------------------------------------------------------------------------------------------------------------------------------------------------------------------------------------------------------------------------------------------------------------------------------------------------------------------------------------------------------------------------------------------------------------------------------------------------------------------------------------------------------------------------------------------------------------------------------------------------------------------------------------------------------------------------------------------------------------------------------------------------------------------------------------------------------------------------------------------------------------------------------------------------------------------------------------------------------------------------------------------------------------------------------------|----------------|
| <b>Manuscript Number:</b>                                                     | GIGA-D-19-00306                                                                                                                                                                                                                                                                                                                                                                                                                                                                                                                                                                                                                                                                                                                                                                                                                                                                                                                                                                                                                                                                                                                                                                                                                                                                                                                                               |                |
| <b>Full Title:</b>                                                            | Artifact-free whole-slide imaging with structured illumination microscopy and Bayesian image reconstruction                                                                                                                                                                                                                                                                                                                                                                                                                                                                                                                                                                                                                                                                                                                                                                                                                                                                                                                                                                                                                                                                                                                                                                                                                                                   |                |
| <b>Article Type:</b>                                                          | Data Note                                                                                                                                                                                                                                                                                                                                                                                                                                                                                                                                                                                                                                                                                                                                                                                                                                                                                                                                                                                                                                                                                                                                                                                                                                                                                                                                                     |                |
| <b>Funding Information:</b>                                                   | National Institute of General Medical Sciences (1R15GM128166-01)                                                                                                                                                                                                                                                                                                                                                                                                                                                                                                                                                                                                                                                                                                                                                                                                                                                                                                                                                                                                                                                                                                                                                                                                                                                                                              | Dr Guy M Hagen |
|                                                                               | Division of Biological Infrastructure (1727033)                                                                                                                                                                                                                                                                                                                                                                                                                                                                                                                                                                                                                                                                                                                                                                                                                                                                                                                                                                                                                                                                                                                                                                                                                                                                                                               | Dr Guy M Hagen |
| <b>Abstract:</b>                                                              | <p>Background</p> <p>Structured illumination microscopy (SIM) is a method which can be used to image biological samples and can achieve both optical sectioning and super-resolution effects. Optimization of the imaging setup and data processing methods results in high quality images without artifacts due to mosaicking or due to the use of SIM methods. Reconstruction methods based on Bayesian estimation can be used to produce images with a resolution beyond that dictated by the optical system. Findings</p> <p>Five complete datasets are presented including large panoramic SIM images of human tissues in pathophysiological conditions. Cancers of the prostate, skin, ovary, and breast, as well as tuberculosis of the lung, were imaged using SIM. The samples are available commercially and are standard histological preparations stained with hematoxylin and eosin. Conclusion</p> <p>The use of fluorescence microscopy is increasing in histopathology. There is a need for methods which reduce artifacts when employing image stitching methods or optical sectioning methods such as SIM. Stitched SIM images produce results which may be useful for intraoperative histology. Releasing high quality, full slide images and related data will aid researchers in furthering the field of fluorescent histopathology.</p> |                |
| <b>Corresponding Author:</b>                                                  | Guy M Hagen, PHD<br><br>UNITED STATES                                                                                                                                                                                                                                                                                                                                                                                                                                                                                                                                                                                                                                                                                                                                                                                                                                                                                                                                                                                                                                                                                                                                                                                                                                                                                                                         |                |
| <b>Corresponding Author Secondary Information:</b>                            |                                                                                                                                                                                                                                                                                                                                                                                                                                                                                                                                                                                                                                                                                                                                                                                                                                                                                                                                                                                                                                                                                                                                                                                                                                                                                                                                                               |                |
| <b>Corresponding Author's Institution:</b>                                    |                                                                                                                                                                                                                                                                                                                                                                                                                                                                                                                                                                                                                                                                                                                                                                                                                                                                                                                                                                                                                                                                                                                                                                                                                                                                                                                                                               |                |
| <b>Corresponding Author's Secondary Institution:</b>                          |                                                                                                                                                                                                                                                                                                                                                                                                                                                                                                                                                                                                                                                                                                                                                                                                                                                                                                                                                                                                                                                                                                                                                                                                                                                                                                                                                               |                |
| <b>First Author:</b>                                                          | Karl A Johnson                                                                                                                                                                                                                                                                                                                                                                                                                                                                                                                                                                                                                                                                                                                                                                                                                                                                                                                                                                                                                                                                                                                                                                                                                                                                                                                                                |                |
| <b>First Author Secondary Information:</b>                                    |                                                                                                                                                                                                                                                                                                                                                                                                                                                                                                                                                                                                                                                                                                                                                                                                                                                                                                                                                                                                                                                                                                                                                                                                                                                                                                                                                               |                |
| <b>Order of Authors:</b>                                                      | Karl A Johnson                                                                                                                                                                                                                                                                                                                                                                                                                                                                                                                                                                                                                                                                                                                                                                                                                                                                                                                                                                                                                                                                                                                                                                                                                                                                                                                                                |                |
|                                                                               | Guy M Hagen, PHD                                                                                                                                                                                                                                                                                                                                                                                                                                                                                                                                                                                                                                                                                                                                                                                                                                                                                                                                                                                                                                                                                                                                                                                                                                                                                                                                              |                |
| <b>Order of Authors Secondary Information:</b>                                |                                                                                                                                                                                                                                                                                                                                                                                                                                                                                                                                                                                                                                                                                                                                                                                                                                                                                                                                                                                                                                                                                                                                                                                                                                                                                                                                                               |                |
| <b>Additional Information:</b>                                                |                                                                                                                                                                                                                                                                                                                                                                                                                                                                                                                                                                                                                                                                                                                                                                                                                                                                                                                                                                                                                                                                                                                                                                                                                                                                                                                                                               |                |
| <b>Question</b>                                                               | <b>Response</b>                                                                                                                                                                                                                                                                                                                                                                                                                                                                                                                                                                                                                                                                                                                                                                                                                                                                                                                                                                                                                                                                                                                                                                                                                                                                                                                                               |                |
| Are you submitting this manuscript to a special series or article collection? | No                                                                                                                                                                                                                                                                                                                                                                                                                                                                                                                                                                                                                                                                                                                                                                                                                                                                                                                                                                                                                                                                                                                                                                                                                                                                                                                                                            |                |

|                                                                                                                                                                                                                                                                                                                                                                                                                                                                                                                                                         |            |
|---------------------------------------------------------------------------------------------------------------------------------------------------------------------------------------------------------------------------------------------------------------------------------------------------------------------------------------------------------------------------------------------------------------------------------------------------------------------------------------------------------------------------------------------------------|------------|
| <p><b>Experimental design and statistics</b></p> <p>Full details of the experimental design and statistical methods used should be given in the Methods section, as detailed in our <a href="#">Minimum Standards Reporting Checklist</a>. Information essential to interpreting the data presented should be made available in the figure legends.</p> <p>Have you included all the information requested in your manuscript?</p>                                                                                                                      | <p>Yes</p> |
| <p><b>Resources</b></p> <p>A description of all resources used, including antibodies, cell lines, animals and software tools, with enough information to allow them to be uniquely identified, should be included in the Methods section. Authors are strongly encouraged to cite <a href="#">Research Resource Identifiers</a> (RRIDs) for antibodies, model organisms and tools, where possible.</p> <p>Have you included the information requested as detailed in our <a href="#">Minimum Standards Reporting Checklist</a>?</p>                     | <p>Yes</p> |
| <p><b>Availability of data and materials</b></p> <p>All datasets and code on which the conclusions of the paper rely must be either included in your submission or deposited in <a href="#">publicly available repositories</a> (where available and ethically appropriate), referencing such data using a unique identifier in the references and in the “Availability of Data and Materials” section of your manuscript.</p> <p>Have you have met the above requirement as detailed in our <a href="#">Minimum Standards Reporting Checklist</a>?</p> | <p>Yes</p> |

# Artifact-free whole-slide imaging with structured illumination microscopy and Bayesian image reconstruction

Karl Johnson<sup>1</sup>, Guy M. Hagen<sup>1\*</sup>

<sup>1</sup>*UCCS center for the Biofrontiers Institute, University of Colorado at Colorado Springs*

*1420 Austin Bluffs Parkway, Colorado Springs, Colorado, 80918, USA*

[\\*ghagen@uccs.edu](mailto:ghagen@uccs.edu)

## Abstract

**Background** Structured illumination microscopy (SIM) is a method which can be used to image biological samples and can achieve both optical sectioning and super-resolution effects. Optimization of the imaging setup and data processing methods results in high quality images without artifacts due to mosaicking or due to the use of SIM methods. Reconstruction methods based on Bayesian estimation can be used to produce images with a resolution beyond that dictated by the optical system.

**Findings** Five complete datasets are presented including large panoramic SIM images of human tissues in pathophysiological conditions. Cancers of the prostate, skin, ovary, and breast, as well as tuberculosis of the lung, were imaged using SIM. The samples are available commercially and are standard histological preparations stained with hematoxylin and eosin.

**Conclusion** The use of fluorescence microscopy is increasing in histopathology. There is a need for methods which reduce artifacts when employing image stitching methods or optical sectioning methods such as SIM. Stitched SIM images produce results which may be useful for intraoperative histology. Releasing high quality, full slide images and related data will aid researchers in furthering the field of fluorescent histopathology.

**Keywords** Structured illumination microscopy, SIM, image stitching, Bayesian methods, MAP-SIM, SIMToolbox, histopathology, cancer.

## Data description

## 24 **Context**

25           Structured illumination microscopy (SIM) is a method in optical fluorescence microscopy which can  
26 achieve both optical sectioning (OS-SIM) [1] and resolution beyond the diffraction limit (SR-SIM) [2,3]. SIM has  
27 been used for super-resolution imaging of both fixed and live cells [4–7] and has matured enough as a method that it  
28 is now available commercially. In SIM, a set of images is acquired using an illumination pattern which shifts  
29 between each image. As SIM has developed, diverse strategies have been proposed for creation of the SIM  
30 pattern [1,8–13]. Several different approaches for processing the data have also been introduced [3,7,8,14–16].

31           Recently, microscope systems capable of imaging with high resolution and a large field of view (FOV)  
32 have been developed [17–21], some using custom-made microscope objectives. However, stitching together images  
33 acquired with a higher magnification objective to create a large mosaic remains a valid and popular approach. Some  
34 published results involving stitched images suffer from pronounced artifacts in which the edges of the individual  
35 sub-images are visible, usually as dark bands which outline each sub-image [22–24]. On the other hand, several  
36 studies have proposed methods for stitching of microscope images with reduced artifacts [25–32].

37           The combination of SIM with image stitching methods allows collection of large FOV images with both  
38 optical sectioning and super-resolution properties. Here, we demonstrate methods and provide complete datasets for  
39 five different samples. The samples are hematoxylin and eosin (H&E) stained histological specimens which provide  
40 examples of human diseases (ovarian cancer, breast cancer, prostate cancer, skin cancer, and tuberculosis), and  
41 which are also available commercially for those who wish to reproduce our work. We used freely available optical  
42 designs [6,10,33] and open source software [33] for SIM imaging, along with freely available software for image  
43 stitching (Microsoft Image Composite Editor (ICE) [34], or a well validated plugin [26] for ImageJ [35]).  
44 Combining this with deconvolution methods, we produced stitched images which are free of noticeable artifacts from  
45 stitching or from SIM reconstruction.

46           Fluorescence microscopy is becoming more important in histopathology. Traditional bright field  
47 microscopy diagnostic methods require a time-consuming process, involving chemical fixation and physical  
48 sectioning. The use of optical sectioning fluorescence microscopy allows high-quality images to be captured without  
49 the need for physical sectioning. Consequently, it has been shown that imaging can be performed on large human  
50 tissue samples within 1 hour after excision [36]. Additionally, other studies have shown the results of fluorescence

51 imaging to be usable and accurate in diagnosis of various medical conditions [37–42]. Previously, it was noted that  
 52 obvious stitching artifacts significantly decrease the usability of large fluorescence images in medical diagnosis. In  
 53 one case, such artifacts resulted in the rejection of over half of the images acquired [38]. The setup we describe here  
 54 allows for fast, artifact-free, high-resolution imaging of fluorescent samples, and is compatible with samples stained  
 55 with most fluorescent dyes.

## 56 **Methods**

### 57 *Samples*

58 All samples used in this study are available from Carolina Biological, Omano, or Ward’s Science. The  
 59 samples are approximately 7  $\mu\text{m}$  thick and are stained with hematoxylin and eosin. The commercial source, product  
 60 number, and other SIM imaging parameters for each sample are detailed in Table 1. Table 2 details imaging  
 61 parameters for acquisitions of each sample with a color camera.

62 Table 1: Imaging parameters for the SIM datasets

| Sample                   | Source company and product no. | SIM pattern no. of phases | Exposure time, ms | No. of tiles   | Objective mag/NA  | Acquisition time, s | Stitching software |
|--------------------------|--------------------------------|---------------------------|-------------------|----------------|-------------------|---------------------|--------------------|
| Carcinoma of Prostate    | Carolina, 318492               | 5                         | 50                | 23 $\times$ 11 | 20 $\times$ /0.45 | 315                 | Microsoft ICE      |
| Basal Cell Carcinoma     | Ward’s Science, 470183-256     | 6                         | 75                | 29 $\times$ 18 | 30 $\times$ /1.05 | 821                 | FIJI               |
| Adenocarcinoma of Ovary  | Carolina, 318628               | 5                         | 100               | 25 $\times$ 14 | 10 $\times$ /0.4  | 595                 | Microsoft ICE      |
| Adenocarcinoma of Breast | Carolina, 318766               | 8                         | 200               | 12 $\times$ 8  | 10 $\times$ /0.4  | 278                 | FIJI               |
| Lung Tuberculosis        | Omano, OMSK-HP50               | 5                         | 100               | 20 $\times$ 16 | 30 $\times$ /1.05 | 541                 | FIJI               |

63 Table 2: Parameters for the color images

| Sample                | No. of tiles | Objective mag/NA |
|-----------------------|--------------|------------------|
| Carcinoma of Prostate | 6 $\times$ 5 | 4 $\times$ /0.16 |
| Basal Cell Carcinoma  | 5 $\times$ 5 | 4 $\times$ /0.16 |

|                          |         |         |
|--------------------------|---------|---------|
| Adenocarcinoma of Ovary  | 11 × 11 | 4×/0.16 |
| Adenocarcinoma of Breast | 6 × 6   | 4×/0.16 |
| Lung Tuberculosis        | 8 × 10  | 10×/0.4 |

64 *Microscope setup and data acquisition*

65 We used a home-built SIM setup based on the same design as described previously [6,10,15] (Fig. 1). The  
66 SIM system is based on an IX83 microscope (Olympus) equipped with a Zyla 4.2+ sCMOS camera (Andor) under  
67 the control of IQ3 software (Andor). We used the following Olympus objectives: UPLSAPO 4×/0.16 NA,  
68 UPLSAPO 10×/0.4 NA, LUCPLFLN 20×/0.45 NA, and UPLSAPO 30×/1.05 NA silicone oil immersion. For color  
69 images we used an aca1920-40uc color camera (Basler) under control of Pylon software (Basler). We used a MS-  
70 2000 motorized microscope stage (Applied Scientific Instrumentation) to acquire tiled SIM images. In all datasets,  
71 the stage scanning was configured such that all image edges overlapped by 20%.

72 Briefly, the SIM system uses a ferroelectric liquid crystal on silicon (LCOS) microdisplay (type SXGA-  
73 3DM, Forth Dimension Displays). This device has been used previously in SIM and related methods in fluorescence  
74 microscopy [5,10,15,33,43–47] and allows one to produce patterns of illumination on the sample which can be  
75 reconfigured at will by changing the image displayed on the device. The light source (Lumencor Spectra-X) is  
76 toggled off between SIM patterns and during camera readout. Close synchronization between the camera  
77 acquisitions, light source, and microdisplay ensures rapid image acquisition, helps reduce artifacts, and reduces light  
78 exposure to the sample. The supplementary material contains more information about system integration.

79 **INSERT FIGURE 1**

80 *SIM data processing*

81 SIM reconstructions were performed using SIMToolbox, an open-source and freely available program that  
82 our group developed for processing SIM data [33]. We generated optically sectioned, enhanced resolution images  
83 using a Bayesian estimation method, maximum *a posteriori* probability SIM (MAP-SIM) [15]. MAP-SIM works  
84 using maximum *a posteriori* probability methods, which are well known in microscopy applications [48,49], to  
85 enhance high spatial frequency image information. We then combine this information, in the frequency domain,  
86 with low spatial frequency image information obtained by OS-SIM methods, then produce the final image by an

87 inverse Fourier transform [15]. We typically measure the final resolution obtained by analyzing the frequency  
88 spectrum of the resulting image, as is discussed below.

89 The illumination patterns used here are generated such that the sum of all positions in each pattern set  
90 results in homogenous illumination. As such, a widefield (WF) image can be reconstructed from SIM data simply by  
91 performing an average intensity projection of the patterned images. This can be described by

$$92 \quad I_{WF} = \frac{1}{N} \sum_{n=1}^N I_n,$$

93 where  $N$  is the number of pattern phases,  $I_n$  is the image acquired on the  $n^{\text{th}}$  illumination position, and  $I_{WF}$  is the WF  
94 reconstruction. This is the method we used to generate WF images throughout this study.

#### 95 *Vignetting correction*

96 Following SIM reconstruction, vignetting artifacts remain in each tile. If not removed prior to stitching, this  
97 vignetting introduces a distracting grid pattern in the final stitched image. We performed vignette removal by  
98 dividing each tile of the mosaic by an image representing the vignetting profile common to all tiles. Other studies  
99 have used an image of a uniformly fluorescent calibration slide as a reference for vignette removal [36], where  
100 information concerning non-uniform illumination is captured. However, we found that SIM processing introduces  
101 vignetting artifacts beyond those due to non-uniform illumination. Additionally, these artifacts vary depending on  
102 properties of the sample being imaged. As such, performing pre-acquisition calibration on a uniformly fluorescent  
103 slide is not sufficient to remove vignetting artifacts from SIM reconstructions. Instead, an estimate of the vignetting  
104 profile is found through analysis of the mosaic tiles after SIM reconstruction.

105 A blurred average intensity projection of the tiles is a good approximation of the vignetting profile, as an  
106 average intensity projection merges the tiles into a single image with reduced foreground information while  
107 preserving vignetting. Subsequent blurring with an appropriate radius and edge-handling method also eliminates the  
108 high spatial frequency foreground without impacting the low spatial frequency illumination profile. To eliminate  
109 errors during the blurring step due to the blurring area extending outside the original image, we used an edge  
110 handling method in which the blurring area is reduced near the edges of the image such that no values outside the  
111 image border are sampled. Unlike edge handling methods in which the image is padded with a uniform value (or

112 mirrored and tiled) to accommodate a blurring area which extends beyond the original image limits, this method is  
113 free from major artifacts, such as erroneous brightness of the image edges (see supplementary figure S1). This  
114 approximation of the illumination profile works especially well for histological samples, as such samples are non-  
115 sparse and require many tiles, factors which improve the accuracy this approach. We performed all steps of this  
116 devignetting process using built-in functions and the ‘Fast Filters’ plugin in ImageJ [50]. The effect of devignetting  
117 is illustrated in Fig. 2.

## 118 **INSERT FIGURE 2**

### 119 *Image Stitching*

120 With visible vignetting removed, we then stitched together a composite image from the tiles. The pre-  
121 processing allows for stitching to be done in various stitching applications; Microsoft ICE and Preibisch’s plugin for  
122 FIJI [26] were used to stitch the data presented here.

123 The data processing procedure is summarized in Fig. 3. The total time for processing each dataset was  
124 about 30 min.

## 125 **INSERT FIGURE 3**

### 126 *Color image data processing methods*

127 We created color overview images by stitching devignetted brightfield acquisitions. Devignetting was  
128 performed simply by adding the inverse of an empty brightfield acquisition to each color tile using ImageJ. For this  
129 method to produce optimal results, the empty brightfield image must be acquired in conditions identical to those of  
130 the raw tile data, such that the illumination profile in the empty image matches that of the unprocessed tiles. This  
131 simple operation removes nearly all visible vignetting and color balance artifacts within each tile. The results after  
132 devignetting were then stitched using Preibisch’s plugin for FIJI [26].

### 133 *Resolution measurement*

134 We evaluated our results by measuring image resolution using SR Measure Toolbox. SR Measure  
135 Toolbox [51] measures the resolution limit of input images through analysis of the normalized, radially averaged  
136 power spectral density ( $PSD_{ca}$ ) of the images, as previously described [6]. Briefly, the resolution limit in real space



137 is determined by evaluating the cutoff frequency in Fourier space. The cutoff frequency is estimated by calculating  
138 the spatial frequency at which the  $PSD_{ca}$  (after noise correction) drops to zero.

139 Focusing on the basal cell carcinoma sample, we selected 125 (out of 522 total) image tiles, calculated the  
140 PSD and resolution for each tile, and averaged the results. We found that, in the case of this sample, the image  
141 resolution was  $593 \pm 20$  nm for WF and  $468 \pm 2.5$  nm for MAP-SIM (average  $\pm$  standard deviation). This data was  
142 acquired with a UPLSAPO 30 $\times$ /1.05 NA silicone oil immersion objective. Figure 4 shows an example measurement  
143 for one image tile. Figure 5 shows a plot of  $PSD_{ca}$  for this image tile.

144 **INSERT FIGURE 4**

145 **INSERT FIGURE 5**

## 146 **Results**

147 Figure 6 shows images of a prepared slide containing a human prostate carcinoma sample stained with  
148 H&E. Fig. 6a shows a stitched color overview, and Fig. 6d shows a zoom-in of the region indicated in Fig. 6a,  
149 acquired separately using a UPLSAPO 20 $\times$ /0.75NA objective. Fig. 6b shows a stitched widefield fluorescence  
150 image, and Fig. 6c shows a stitched SIM image. Figs. 6e and 6f each show zoom-ins of the stitches shown in Figs.  
151 6b and 6c, respectively. Using the acquisition and processing methods described, whole-slide images are produced  
152 without any visible stitching artifacts. Additionally, the MAP-SIM reconstruction method produces resolution  
153 superior to that of the widefield data.

154 Figures 7-10 show similar comparisons for basal cell carcinoma, ovary adenocarcinoma, breast  
155 adenocarcinoma, and tuberculosis of the lung, respectively.

156 The data shown in figures 6-10 is freely available through Giga DB [reference to be added]. This dataset  
157 includes all color overviews as well as WF and MAP-SIM stitches at full resolution. In addition, all image tiles  
158 (prior to deconvolution) used to create the WF and MAP-SIM stitches of the basal cell carcinoma sample are  
159 provided.

160 **INSERT FIGURE 6**

161 **INSERT FIGURE 7**

162 **INSERT FIGURE 8**

163 **INSERT FIGURE 9**

164 **INSERT FIGURE 10**

165 **Discussion**

166 Many past studies into stitching of SIM mosaics have suffered from noticeable image artifacts, arising from  
167 flaws in the optical setups used as well as imperfections in the SIM reconstruction and image stitching processes.  
168 While these artifacts are sometimes minimal enough to remain uncorrected, certain artifacts seriously inhibit the  
169 usefulness of the final stitched image. In [23], the authors note that issues in triggering and evenly illuminating the  
170 microdisplay being used for illumination resulted in striping and vignetting artifacts; similarly, in [22,24,36,52],  
171 stitching artifacts are apparent in the images. Here, optimization of the optical setup, camera-microdisplay  
172 synchronization, and image processing methods yielded whole-slide images free from visible SIM or image stitching  
173 artifacts. In addition to the elimination of artifacts, our use of SIMToolbox to perform SIM reconstruction on the  
174 data allows for a variety of reconstruction algorithms to be used, including super-resolution algorithms such as  
175 MAP-SIM. This too presents an improvement over previous works. Our methods also allow for stitching of high-  
176 magnification tiles into large-FOV images with subdiffractive detail (see supplementary Fig. S3).

177 Another advantage of the acquisition and processing methods demonstrated here is the minimization of  
178 user intervention, and in turn, reductions in acquisition and processing time. Firstly, the use of Andor IQ during  
179 acquisition allows for stage movement, sample focusing, image acquisition, and SIM pattern advancement to be  
180 controlled automatically. Loading of the sample, definition of the mosaic edges, and manual focus on 3-5 positions  
181 of the sample are the only steps needed to be taken by the user before acquisition can begin. Recent developments in  
182 autofocus technology for SIM may allow for the manual focus step to be shortened or omitted [52]. These automated  
183 steps during acquisition allow for large mosaics to be acquired. The quality of the final stitched images does not  
184 degrade for larger mosaics – in fact, the quality of the devignetting process improves with larger datasets, as more  
185 data is available to produce an accurate estimation of the illumination profile. SIMToolbox (version 2.0), which is  
186 capable of utilizing the processing power of modern consumer graphics cards during MAP-SIM processing, also  
187 reduces the time spent during the data processing phase. Finally, unlike other super-resolution reconstruction

188 methods such as SR-SIM, MAP-SIM is able to produce artifact-free results without tuning of reconstruction  
189 parameters by the user, a process which is difficult to automate and requires significant user experience.

190 One drawback the method presented here is the inability to image the entire volume of samples thicker than  
191 ~0.5 mm. However, this limitation does not prevent large, unsectioned samples from being imaged, as is the case  
192 with bright field microscopy, where samples must be thin enough for transmitted light to reach the objective. Rather,  
193 as the light which illuminates the sample in fluorescence microscopy emanates from the objective, all surface  
194 regions of a large sample may be imaged. Additionally, due to the optical sectioning exhibited by SIM, light from  
195 out-of-focus regions of the sample is almost completely attenuated. Consequently, imaging the surfaces of large  
196 samples with SIM produces high-contrast images of thin regions without the need for physical sectioning, as  
197 previously demonstrated [23,36].

198 Here, we demonstrated our imaging techniques on traditionally prepared histopathological samples in order  
199 to provide a comparison between bright field imaging and SIM, but the same techniques can be used to image a  
200 wide variety of fluorescently labelled samples, as demonstrated in the supplementary material. The ability to  
201 seamlessly image the entire surface region of large samples has multiple potential applications in histopathology.  
202 SIM presents unique advantages in analyzing the surgical margins of large tissue excisions, as demonstrated by  
203 Wang [36]. Briefly, due to the ability of SIM to image an unsectioned sample, analysis of surgical margins using  
204 SIM requires imaging of far less surface area than that needed for bright field imaging. Confocal imaging of core  
205 needle biopsy samples has been previously demonstrated to produce images suitable for medical diagnosis [42], a  
206 practice easily adapted to SIM. The speed at which sample preparation and image acquisition can be performed in  
207 fluorescence microscopy presents opportunities for intra-operative analysis of tissue samples using SIM techniques,  
208 as mentioned by multiple other studies [23,36,53,54].

## 209 **Reuse potential**

210 The data provided here presents various opportunities for reuse. Firstly, the unstitched image tiles provided  
211 in the dataset, which still contain vignetting artifacts, may be used to reproduce the results of our devignetting  
212 process, as well as to further develop more sophisticated devignetting approaches suited for SIM. These tiles might  
213 also be used to create or modify existing stitching software for global minimization of stitching artifacts. For  
214 example, the frequency-domain detection of periodic stitching artifacts discussed in the supplementary material

215 could be used to minimize such artifacts in developing new stitching software. With the multiple high-resolution  
216 color overviews and stitched SIM images, comparison of structures visible in the brightfield and fluorescent images  
217 could be performed to further study the use of fluorescence microscopy in histopathology.

#### 218 **Availability of source code and requirements**

219 Project name: SIMToolbox version 2.12

220 Project home page: <http://mmtg.fel.cvut.cz/SIMToolbox/>

221 Operating system: platform independent

222 Programming language: MATLAB

223 License: GNU General Public License v3.0

#### 224 **Detailed software compatibility notes**

225 The SIMToolbox GUI was compiled with MATLAB 2015a and tested in Windows 7 and 8. The GUI is a stand-alone  
226 program and does not require MATLAB to be installed. To use the MATLAB functions within SIMToolbox (i.e.,  
227 without the GUI), MATLAB must be installed. The functions were mainly developed with 64 bit MATLAB versions  
228 2012b, 2014a, 2015a in Windows 7. When using SIMToolbox functions without the GUI, the MATLAB “Image  
229 Processing Toolbox” is required. SIMToolbox also requires the “MATLAB YAML” package to convert MATLAB  
230 objects to/from YAML file format. Note that this package is installed automatically when using the GUI.

#### 231 **Availability of data**

232 All raw and analyzed data is available on GigaDB at <http://gigadb.org/site/index>.

#### 233 **Abbreviations**

234 Av Int Proj, average intensity projection; FOV, field of view; H&E, hematoxylin and eosin; ICE, Image Composite  
235 Editor; MAP-SIM, maximum *a posteriori* probability SIM; NA, numerical aperture; LCOS, liquid crystal on silicon;  
236 PSDca, circularly averaged power spectral density; SIM, structured illumination microscopy; WF, wide field.

#### 237 **Ethics approval and consent to participate**

238 Not applicable

#### 239 **Consent for publication**

240 Not applicable

#### 241 **Competing interests**

242 The authors declare that they have no competing interests.

243 **Funding**

244 Research reported in this publication was supported by the National Institute of General Medical Sciences of the  
245 National Institutes of Health under award number 1R15GM128166-01. This work was also supported by the UCCS  
246 center for the University of Colorado BioFrontiers Institute. The funding sources had no involvement in study design;  
247 in the collection, analysis and interpretation of data; in the writing of the report; or in the decision to submit the article  
248 for publication. This material is based in part upon work supported by the National Science Foundation under Grant  
249 Number 1727033. Any opinions, findings, and conclusions or recommendations expressed in this material are those  
250 of the authors and do not necessarily reflect the views of the National Science Foundation.

251 **Author Contributions**

252 KJ: acquired data, analyzed data, wrote the paper

253 GH: conceived project, acquired data, analyzed data, supervised research, wrote the paper

254 **References**

- 255 1. M. A. A. Neil, R. Juškaitis, and T. Wilson, "Method of obtaining optical sectioning by using structured light  
256 in a conventional microscope," *Opt. Lett.* **22**, 1905–1907 (1997).
- 257 2. M. G. L. Gustafsson, "Surpassing the lateral resolution limit by a factor of two using structured illumination  
258 microscopy," *J. Microsc.* **198**, 82–87 (2000).
- 259 3. R. Heintzmann and C. Cremer, "Laterally modulated excitation microscopy: improvement of resolution by  
260 using a diffraction grating," *Proc. SPIE* **3568**, 185–196 (1998).
- 261 4. L. Schermelleh, P. M. Carlton, S. Haase, L. Shao, L. Winoto, P. Kner, B. Burke, M. C. Cardoso, D. A.  
262 Agard, M. G. L. Gustafsson, H. Leonhardt, and J. W. Sedat, "Subdiffraction multicolor imaging of the  
263 nuclear periphery with 3D structured illumination microscopy," *Science (80-. )*. **320**, 1332–1336 (2008).
- 264 5. R. Fiolka, L. Shao, E. H. Rego, M. W. Davidson, and M. G. L. Gustafsson, "Time-lapse two-color 3D  
265 imaging of live cells with doubled resolution using structured illumination," *Proc. Natl. Acad. Sci. U. S. A.*  
266 **109**, 5311–5315 (2012).
- 267 6. J. Pospíšil, T. Lukeš, J. Bendesky, K. Fliegel, K. Spendier, and G. M. Hagen, "Imaging tissues and cells  
268 beyond the diffraction limit with structured illumination microscopy and Bayesian image reconstruction,"  
269 *Gigascience* **8**, giy126 (2019).
- 270 7. X. Huang, J. Fan, L. Li, H. Liu, R. Wu, Y. Wu, L. Wei, H. Mao, A. Lal, P. Xi, L. Tang, Y. Zhang, Y. Liu, S.

- 271 Tan, and L. Chen, "Fast, long-term, super-resolution imaging with Hessian structured illumination  
272 microscopy," *Nat. Biotechnol.* (2018).
- 273 8. M. G. L. Gustafsson, L. Shao, P. M. Carlton, C. J. R. Wang, I. N. Golubovskaya, W. Z. Cande, D. A. Agard,  
274 and J. W. Sedat, "Three-dimensional resolution doubling in widefield fluorescence microscopy by structured  
275 illumination," *Biophys. J.* **94**, 4957–4970 (2008).
- 276 9. S. Rossberger, G. Best, D. Baddeley, R. Heintzmann, U. Birk, S. Dithmar, and C. Cremer, "Combination of  
277 structured illumination and single molecule localization microscopy in one setup," *J. Opt.* **15**, 094003  
278 (2013).
- 279 10. P. Křížek, I. Raška, and G. M. Hagen, "Flexible structured illumination microscope with a programmable  
280 illumination array," *Opt. Express* **20**, 24585 (2012).
- 281 11. P. Kner, B. B. Chhun, E. R. Griffis, L. Winoto, and M. G. L. Gustafsson, "Super-resolution video  
282 microscopy of live cells by structured illumination," *Nat. Methods* **6**, 339–342 (2009).
- 283 12. L. J. Young, F. Ströhl, and C. F. Kaminski, "A Guide to Structured Illumination TIRF Microscopy at High  
284 Speed with Multiple Colors," *J. Vis. Exp.* e53988–e53988 (2016).
- 285 13. V. Poher, H. X. Zhang, G. T. Kennedy, C. Griffin, S. Oddos, E. Gu, D. S. Elson, M. Girkin, P. M. W.  
286 French, M. D. Dawson, and M. A. Neil, "Optical sectioning microscope with no moving parts using a micro-  
287 stripe array light emitting diode," *Opt. Express* **15**, 11196–11206 (2007).
- 288 14. F. Orieux, E. Sepulveda, V. Loriette, B. Dubertret, and J.-C. Olivo-Marin, "Bayesian estimation for  
289 optimized structured illumination microscopy," *IEEE Trans. Image Process.* **21**, 601–14 (2012).
- 290 15. T. Lukeš, P. Křížek, Z. Švindrych, J. Benda, M. Ovesný, K. Fliegel, M. Klíma, and G. M. Hagen, "Three-  
291 dimensional super-resolution structured illumination microscopy with maximum a posteriori probability  
292 image estimation," *Opt. Express* **22**, 29805–17 (2014).
- 293 16. T. Lukeš, G. M. Hagen, P. Křížek, Z. Švindrych, M. Klíma, and K. Fliegel, "Comparison of image  
294 reconstruction methods for structured illumination microscopy," *Proc. SPIE* **9129**, 91293J (2014).
- 295 17. C. A. Werley, M.-P. Chien, and A. E. Cohen, "An ultrawidefield microscope for high-speed fluorescence  
296 imaging and targeted optogenetic stimulation," *Biomed. Opt. Express* **8**, 5794 (2017).
- 297 18. N. J. Sofroniew, D. Flickinger, J. King, and K. Svoboda, "A large field of view two-photon mesoscope with  
298 subcellular resolution for in vivo imaging," *Elife* **5**, (2016).

- 299 19. G. McConnell, J. Trägårdh, R. Amor, J. Dempster, E. Reid, and W. B. Amos, "A novel optical microscope  
300 for imaging large embryos and tissue volumes with sub-cellular resolution throughout," *Elife* **5**, (2016).
- 301 20. P. J. Keller, A. D. Schmidt, J. Wittbrodt, and E. H. K. Stelzer, "Reconstruction of zebrafish early embryonic  
302 development by scanned light sheet microscopy," *Science* (80-. ). **322**, 1065–1069 (2008).
- 303 21. J. N. Stirman, I. T. Smith, M. W. Kudenov, and S. L. Smith, "Wide field-of-view, multi-region, two-photon  
304 imaging of neuronal activity in the mammalian brain," *Nat. Biotechnol.* **34**, 857–862 (2016).
- 305 22. B. Migliori, M. S. Datta, C. Dupre, M. C. Apak, S. Asano, R. Gao, E. S. Boyden, O. Hermanson, R. Yuste,  
306 and R. Tomer, "Light sheet theta microscopy for rapid high-resolution imaging of large biological samples,"  
307 *BMC Biol.* **16**, 57 (2018).
- 308 23. T. C. Schlichenmeyer, M. Wang, K. N. Elfer, and J. Q. Brown, "Video-rate structured illumination  
309 microscopy for high-throughput imaging of large tissue areas," *Biomed. Opt. Express* **5**, 366 (2014).
- 310 24. D. Xu, T. Jiang, A. Li, B. Hu, Z. Feng, H. Gong, S. Zeng, and Q. Luo, "Fast optical sectioning obtained by  
311 structured illumination microscopy using a digital mirror device," *J. Biomed. Opt.* **18**, 060503 (2013).
- 312 25. F. B. Legesse, O. Chernavskaja, S. Heuke, T. Bocklitz, T. Meyer, J. Popp, and R. Heintzmann, "Seamless  
313 stitching of tile scan microscope images," *J. Microsc.* **258**, 223–232 (2015).
- 314 26. S. Preibisch, S. Saalfeld, and P. Tomancak, "Globally optimal stitching of tiled 3D microscopic image  
315 acquisitions," *Bioinformatics* **25**, 1463–1465 (2009).
- 316 27. C. Murtin, C. Frindel, D. Rousseau, and K. Ito, "Image processing for precise three-dimensional registration  
317 and stitching of thick high-resolution laser-scanning microscopy image stacks," *Comput. Biol. Med.* **92**, 22–  
318 41 (2018).
- 319 28. J. Chalfoun, M. Majurski, T. Blattner, K. Bhadriraju, W. Keyrouz, P. Bajcsy, and M. Brady, "MIST:  
320 Accurate and Scalable Microscopy Image Stitching Tool with Stage Modeling and Error Minimization," *Sci.*  
321 *Rep.* **7**, 4988 (2017).
- 322 29. Y. Yu and H. Peng, "Automated high speed stitching of large 3D microscopic images," in *2011 IEEE*  
323 *International Symposium on Biomedical Imaging: From Nano to Macro* (IEEE, 2011), pp. 238–241.
- 324 30. A. Bria and G. Iannello, "TeraStitcher - A tool for fast automatic 3D-stitching of teravoxel-sized microscopy  
325 images," *BMC Bioinformatics* **13**, 316 (2012).
- 326 31. F. Yang, Z.-S. Deng, and Q.-H. Fan, "A method for fast automated microscope image stitching," *Micron* **48**,

- 327 17–25 (2013).
- 328 32. P. Thévenaz and M. Unser, "User-friendly semiautomated assembly of accurate image mosaics in  
329 microscopy," *Microsc. Res. Tech.* **70**, 135–146 (2007).
- 330 33. P. Křížek, T. Lukeš, M. Ovesný, K. Fliegel, and G. M. Hagen, "SIMToolbox: A MATLAB toolbox for  
331 structured illumination fluorescence microscopy," *Bioinformatics* **32**, 318–320 (2015).
- 332 34. Microsoft, "Image Composite Editor," [https://www.microsoft.com/en-us/research/product/computational-  
333 photography-applications/image-composite-editor/#!/support](https://www.microsoft.com/en-us/research/product/computational-photography-applications/image-composite-editor/#!/support).
- 334 35. C. A. Schneider, W. S. Rasband, and K. W. Eliceiri, "NIH Image to ImageJ: 25 years of image analysis.,"  
335 *Nat. Methods* **9**, 671–5 (2012).
- 336 36. M. Wang, D. B. Tulman, A. B. Sholl, H. Z. Kimbrell, S. H. Mandava, K. N. Elfer, S. Luethy, M. M.  
337 Maddox, W. Lai, B. R. Lee, and J. Q. Brown, "Gigapixel surface imaging of radical prostatectomy  
338 specimens for comprehensive detection of cancer-positive surgical margins using structured illumination  
339 microscopy," *Sci. Rep.* **6**, 27419 (2016).
- 340 37. J. L. Dobbs, H. Ding, A. P. Benveniste, H. M. Kuerer, S. Krishnamurthy, W. Yang, and R. Richards-  
341 Kortum, "Feasibility of confocal fluorescence microscopy for real-time evaluation of neoplasia in fresh  
342 human breast tissue," *J. Biomed. Opt.* **18**, 106016 (2013).
- 343 38. D. S. Gareau, "Feasibility of digitally stained multimodal confocal mosaics to simulate histopathology," *J.*  
344 *Biomed. Opt.* **14**, 034050 (2009).
- 345 39. M. T. Tilli, M. C. Cabrera, A. R. Parrish, K. M. Torre, M. K. Sidawy, A. L. Gallagher, E. Makariou, S. A.  
346 Polin, M. C. Liu, and P. A. Furth, "Real-time imaging and characterization of human breast tissue by  
347 reflectance confocal microscopy," *J. Biomed. Opt.* **12**, 051901 (2007).
- 348 40. A. Parrish, E. Halama, M. T. Tilli, M. Freedman, and P. A. Furth, "Reflectance confocal microscopy for  
349 characterization of mammary ductal structures and development of neoplasia in genetically engineered  
350 mouse models of breast cancer," *J. Biomed. Opt.* **10**, 051602 (2005).
- 351 41. Y. Chen, W. Xie, A. K. Glaser, N. P. Reder, C. Mao, S. M. Dintzis, J. C. Vaughan, and J. T. C. Liu, "Rapid  
352 pathology of lumpectomy margins with open-top light-sheet (OTLS) microscopy," *Biomed. Opt. Express*  
353 **10**, 1257 (2019).
- 354 42. J. Dobbs, S. Krishnamurthy, M. Kyrish, A. P. Benveniste, W. Yang, and R. Richards-Kortum, "Confocal



- 355 fluorescence microscopy for rapid evaluation of invasive tumor cellularity of inflammatory breast carcinoma  
356 core needle biopsies," *Breast Cancer Res. Treat.* **149**, 303–310 (2015).
- 357 43. G. M. Hagen, W. Caarls, K. A. Lidke, A. H. B. De Vries, C. Fritsch, B. G. Barisas, D. J. Arndt-Jovin, and T.  
358 M. Jovin, "Fluorescence recovery after photobleaching and photoconversion in multiple arbitrary regions of  
359 interest using a programmable array microscope," *Microsc. Res. Tech.* **72**, 431–440 (2009).
- 360 44. S. R. Kantelhardt, W. Caarls, A. H. B. de Vries, G. M. Hagen, T. M. Jovin, W. Schulz-Schaeffer, V. Rohde,  
361 A. Giese, and D. J. Arndt-Jovin, "Specific Visualization of Glioma Cells in Living Low-Grade Tumor  
362 Tissue," *PLoS One* **5**, e11323 (2010).
- 363 45. L. Shao, P. Kner, E. H. Rego, and M. G. L. Gustafsson, "Super-resolution 3D microscopy of live whole cells  
364 using structured illumination," *Nat. Methods* **8**, 1044–1046 (2011).
- 365 46. B.-C. Chen, W. R. Legant, K. Wang, L. Shao, D. E. Milkie, M. W. Davidson, C. Janetopoulos, X. S. Wu, J.  
366 A. Hammer, Z. Liu, B. P. English, Y. Mimori-Kiyosue, D. P. Romero, A. T. Ritter, J. Lippincott-Schwartz,  
367 L. Fritz-Laylin, R. D. Mullins, D. M. Mitchell, J. N. Bembenek, A.-C. Reymann, R. Bohme, S. W. Grill, J.  
368 T. Wang, G. Seydoux, U. S. Tulu, D. P. Kiehart, and E. Betzig, "Lattice light-sheet microscopy: Imaging  
369 molecules to embryos at high spatiotemporal resolution," *Science* (80-. ). **346**, 1257998 (2014).
- 370 47. G. M. Hagen, W. Caarls, M. Thomas, A. Hill, K. A. Lidke, B. Rieger, C. Fritsch, B. van Geest, T. M. Jovin,  
371 and D. J. Arndt-Jovin, "Biological applications of an LCoS-based programmable array microscope (PAM),"  
372 in D. L. Farkas, R. C. Leif, and D. V. Nicolau, eds. (2007), p. 64410S.
- 373 48. H. Hurwitz, "Entropy reduction in Bayesian analysis of measurements," *Phys. Rev. A* **12**, 698–706 (1975).
- 374 49. P. J. Verveer and T. M. Jovin, "Efficient superresolution restoration algorithms using maximum a posteriori  
375 estimations with application to fluorescence microscopy," *J. Opt. Soc. Am. A* **14**, 1696 (1997).
- 376 50. Michael Schmid, "Fast Filters," [https://imagejdocu.tudor.lu/plugin/filter/fast\\_filters/start](https://imagejdocu.tudor.lu/plugin/filter/fast_filters/start).
- 377 51. K. Fliegel, M. Klíma, and J. Pospíšil, "Assessing resolution in live cell structured illumination microscopy,"  
378 in *Photonics, Devices, and Systems VII*, P. Páta and K. Fliegel, eds. (SPIE, 2017), Vol. 10603, p. 39.
- 379 52. T. C. Schlichenmeyer, M. Wang, C. Wenk, J. Q. Brown, and J. Q. Brown, "Autofocus optimization for  
380 tracking tissue surface topography in large-area mosaicking structured illumination microscopy," in  
381 *Frontiers in Optics 2014* (OSA, 2014), p. FM4F.3.
- 382 53. H. L. Fu, J. L. Mueller, M. P. Javid, J. K. Mito, D. G. Kirsch, N. Ramanujam, and J. Q. Brown,

383 "Optimization of a Widefield Structured Illumination Microscope for Non-Destructive Assessment and  
384 Quantification of Nuclear Features in Tumor Margins of a Primary Mouse Model of Sarcoma," PLoS One **8**,  
385 e68868 (2013).

386 54. H. L. Fu, J. L. Mueller, M. J. Whitley, D. M. Cardona, R. M. Willett, D. G. Kirsch, J. Q. Brown, and N.  
387 Ramanujam, "Structured Illumination Microscopy and a Quantitative Image Analysis for the Detection of  
388 Positive Margins in a Pre-Clinical Genetically Engineered Mouse Model of Sarcoma," PLoS One **11**,  
389 e0147006 (2016).

### 390 **FIGURE CAPTIONS**

391 Figure 1: Simplified diagram of SIM system. LCOS, liquid crystal on silicon

392 Figure 2: Vignetting artifacts and their removal. (a) shows the result of stitching images without applying the  
393 devignetting process, while (b) shows a stitch of the same data after devignetting has been applied. (c) shows the  
394 average intensity projection of the images used to stitch (a), which estimates the vignette profile of each frame. This  
395 estimate can be refined by application of an edge-limited blurring filter, as shown in (d). (e) shows the average  
396 intensity projection of the data used in (b), after devignetting has been applied. The uniform brightness of (e)  
397 indicates that no major vignetting artifacts remain in the devignetted data.

398 Figure 3. Panoramic SIM data processing workflow. Devignetting was performed after SIM reconstruction. Note the  
399 vignette profile differs between reconstruction methods, necessitating separate projection, blurring and division  
400 steps. Av Int Proj refers to average intensity projection.

401 Figure 4. Evaluating image resolution. (a) and (b) show a tile from the data in Fig. 7 (basal cell carcinoma sample)  
402 after widefield and MAP-SIM reconstruction, respectively. (c) and (d) each show a zoom-in of (a) and (b),  
403 respectively. (e) and (f) each show the FFT of (a) and (b), respectively. The dotted lines in (e) and (f) indicate the  
404 resolution of each image according to the resolution measurement described.

405 Figure 5. Normalized, radially averaged power spectral density ( $PSD_{ca}$ ) and resolution analysis measured on the tiles  
406 shown in Figs. 4a and 4b.

407 Figure 6: Carcinoma of human prostate. (a) Color overview, (b) WF stitch, (c) MAP-SIM stich. (d) shows a region  
408 of the sample indicated in (a). (e) and (f) each show a zoom-in of (b) and (c), respectively, in the region indicated in  
409 (a).

410 Figure 7: Basal Cell Carcinoma. (a) Color overview, (b) WF stitch, (c) MAP-SIM stich. (d) shows a region of the  
411 sample indicated in (a). (e) and (f) each show a zoom-in of (b) and (c), respectively, in the region indicated in (a).

412 Figure 8: Adenocarcinoma of human ovary. (a) Color overview, (b) WF stitch, (c) MAP-SIM stich. (d), (g) show a  
413 region of the sample indicated in (a), acquired separately from (a) using a 10× objective. (e) and (h) show a zoom-in  
414 of (b), while (f) and (i) show a zoom-in of (c), all in the regions indicated in (a).

415 Figure 9: Adenocarcinoma of human breast. (a) Color overview, (b) WF stitch, (c) MAP-SIM stich. (d) shows a  
416 region of the sample indicated in (a), acquired separately from (a) using a 10× objective. (e) and (f) each show a  
417 zoom-in of (b) and (c), respectively, in the region indicated in (a).

418 Figure 10: Tuberculosis of human lung. (a) Color overview, (b) WF stitch, (c) MAP-SIM stich. (d) shows a region  
419 of the sample indicated in (a), acquired separately from (a) using a 20× objective. (e) and (f) each show a zoom-in of  
420 (b) and (c), respectively, in the region indicated in (a).

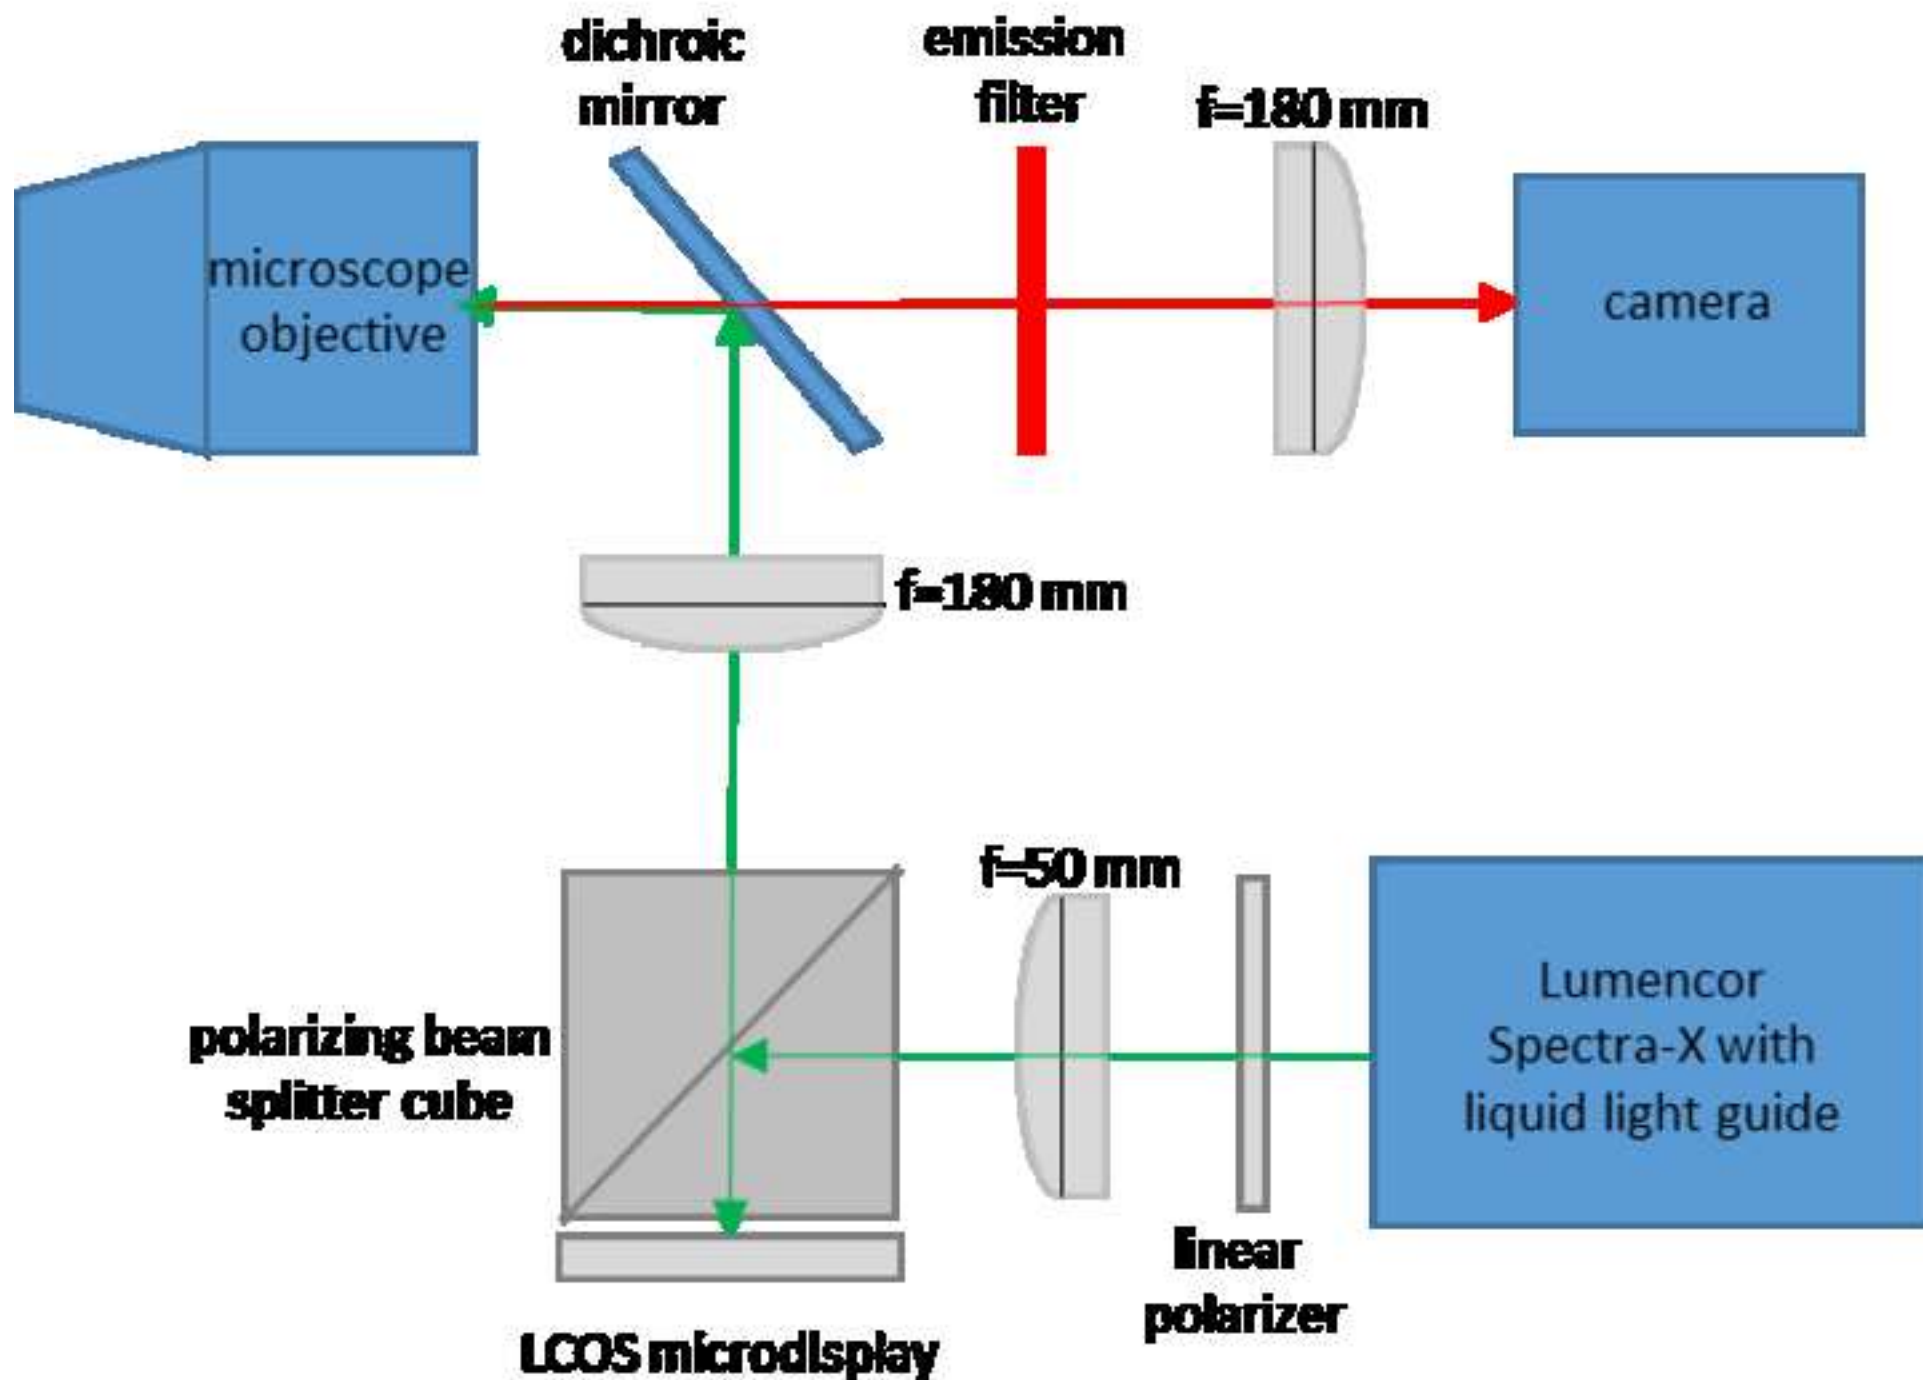

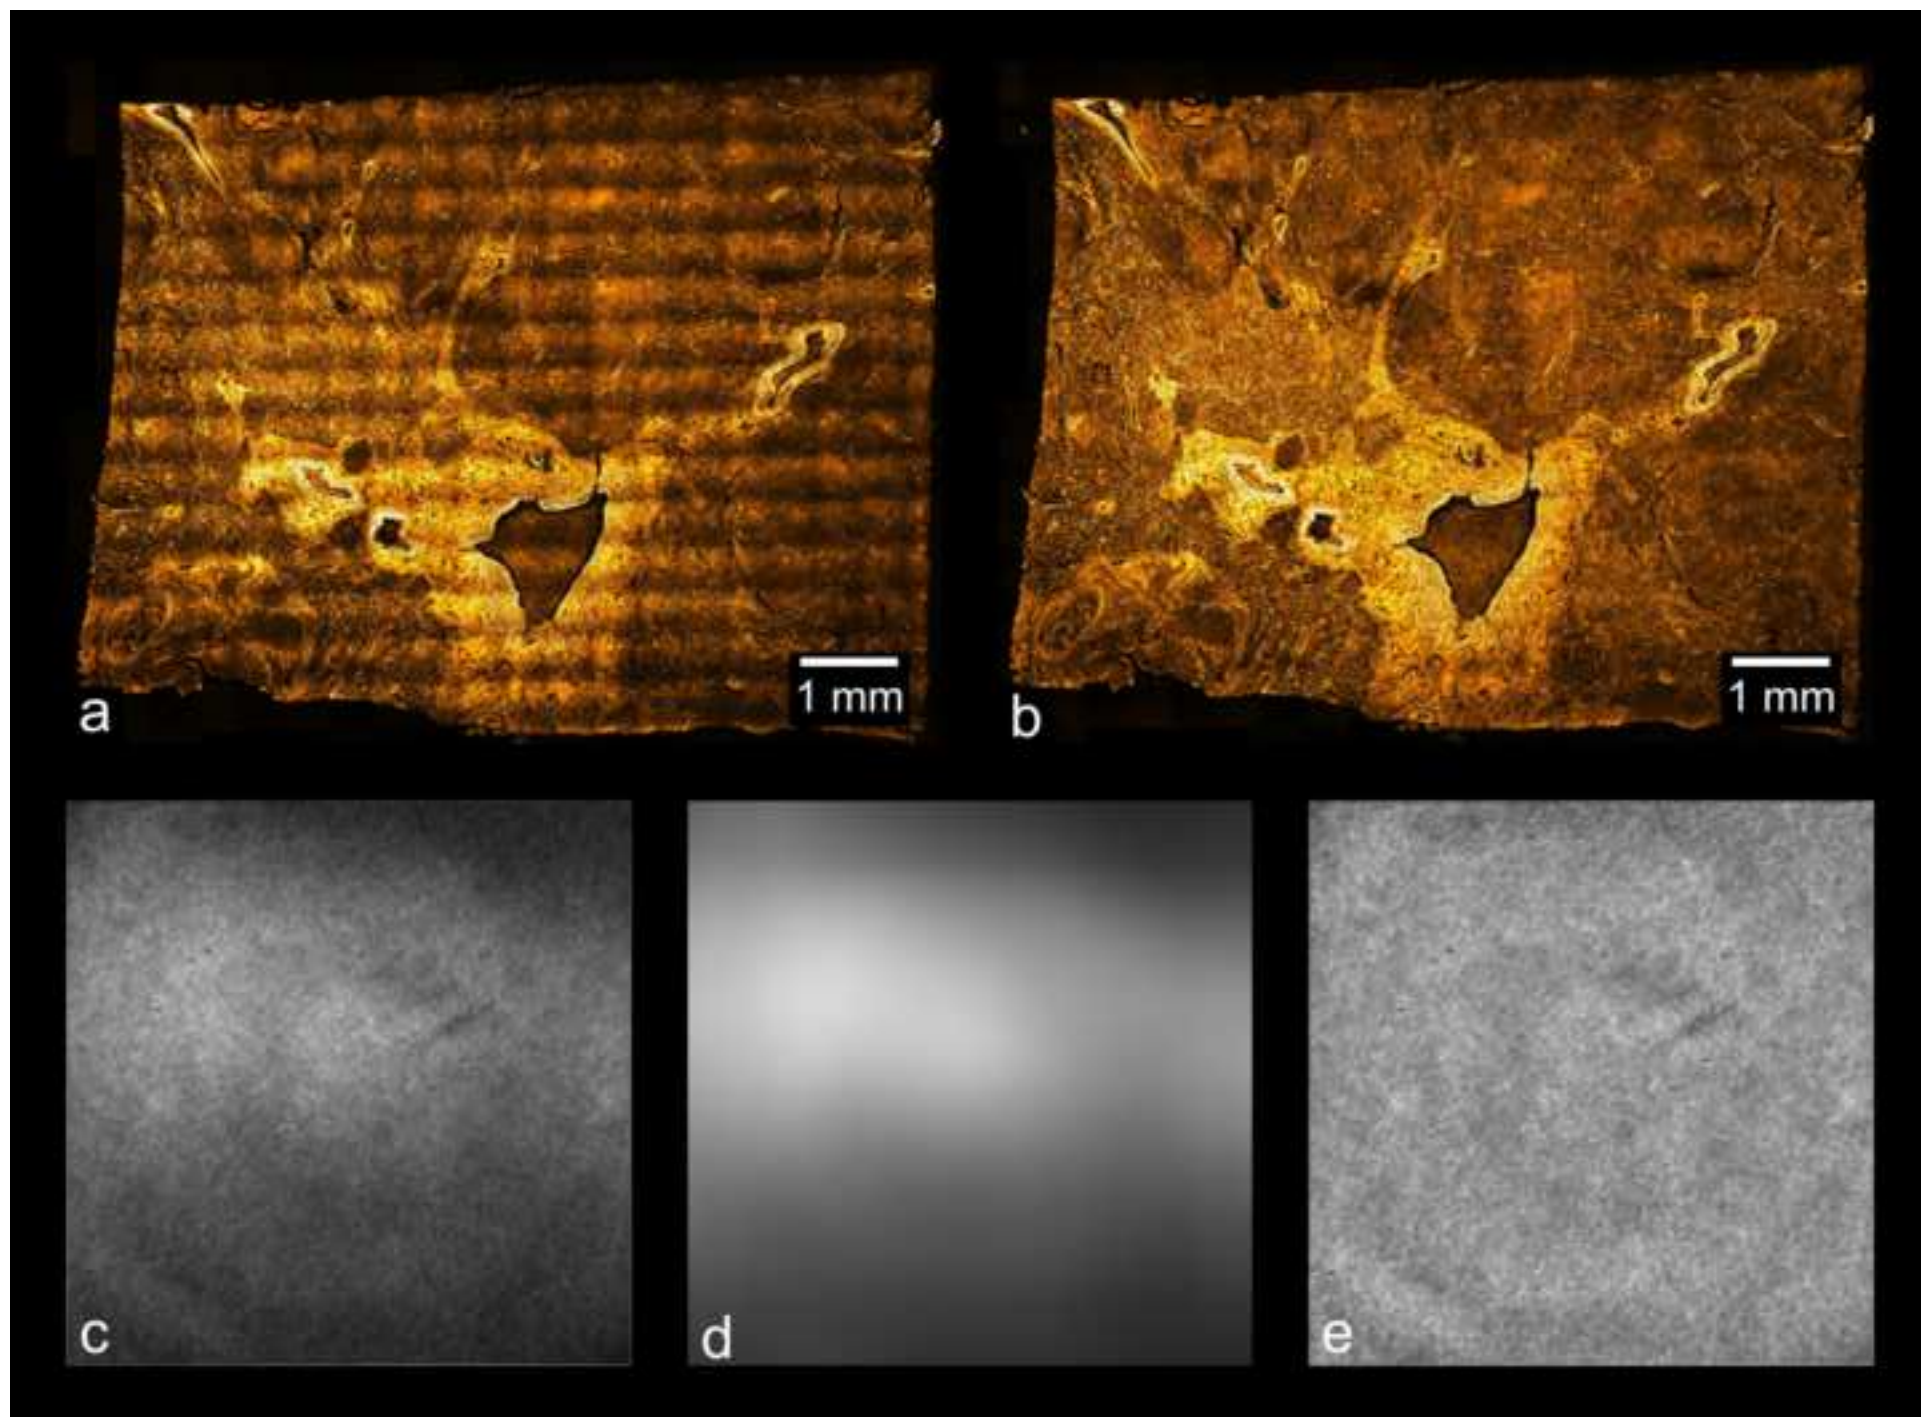

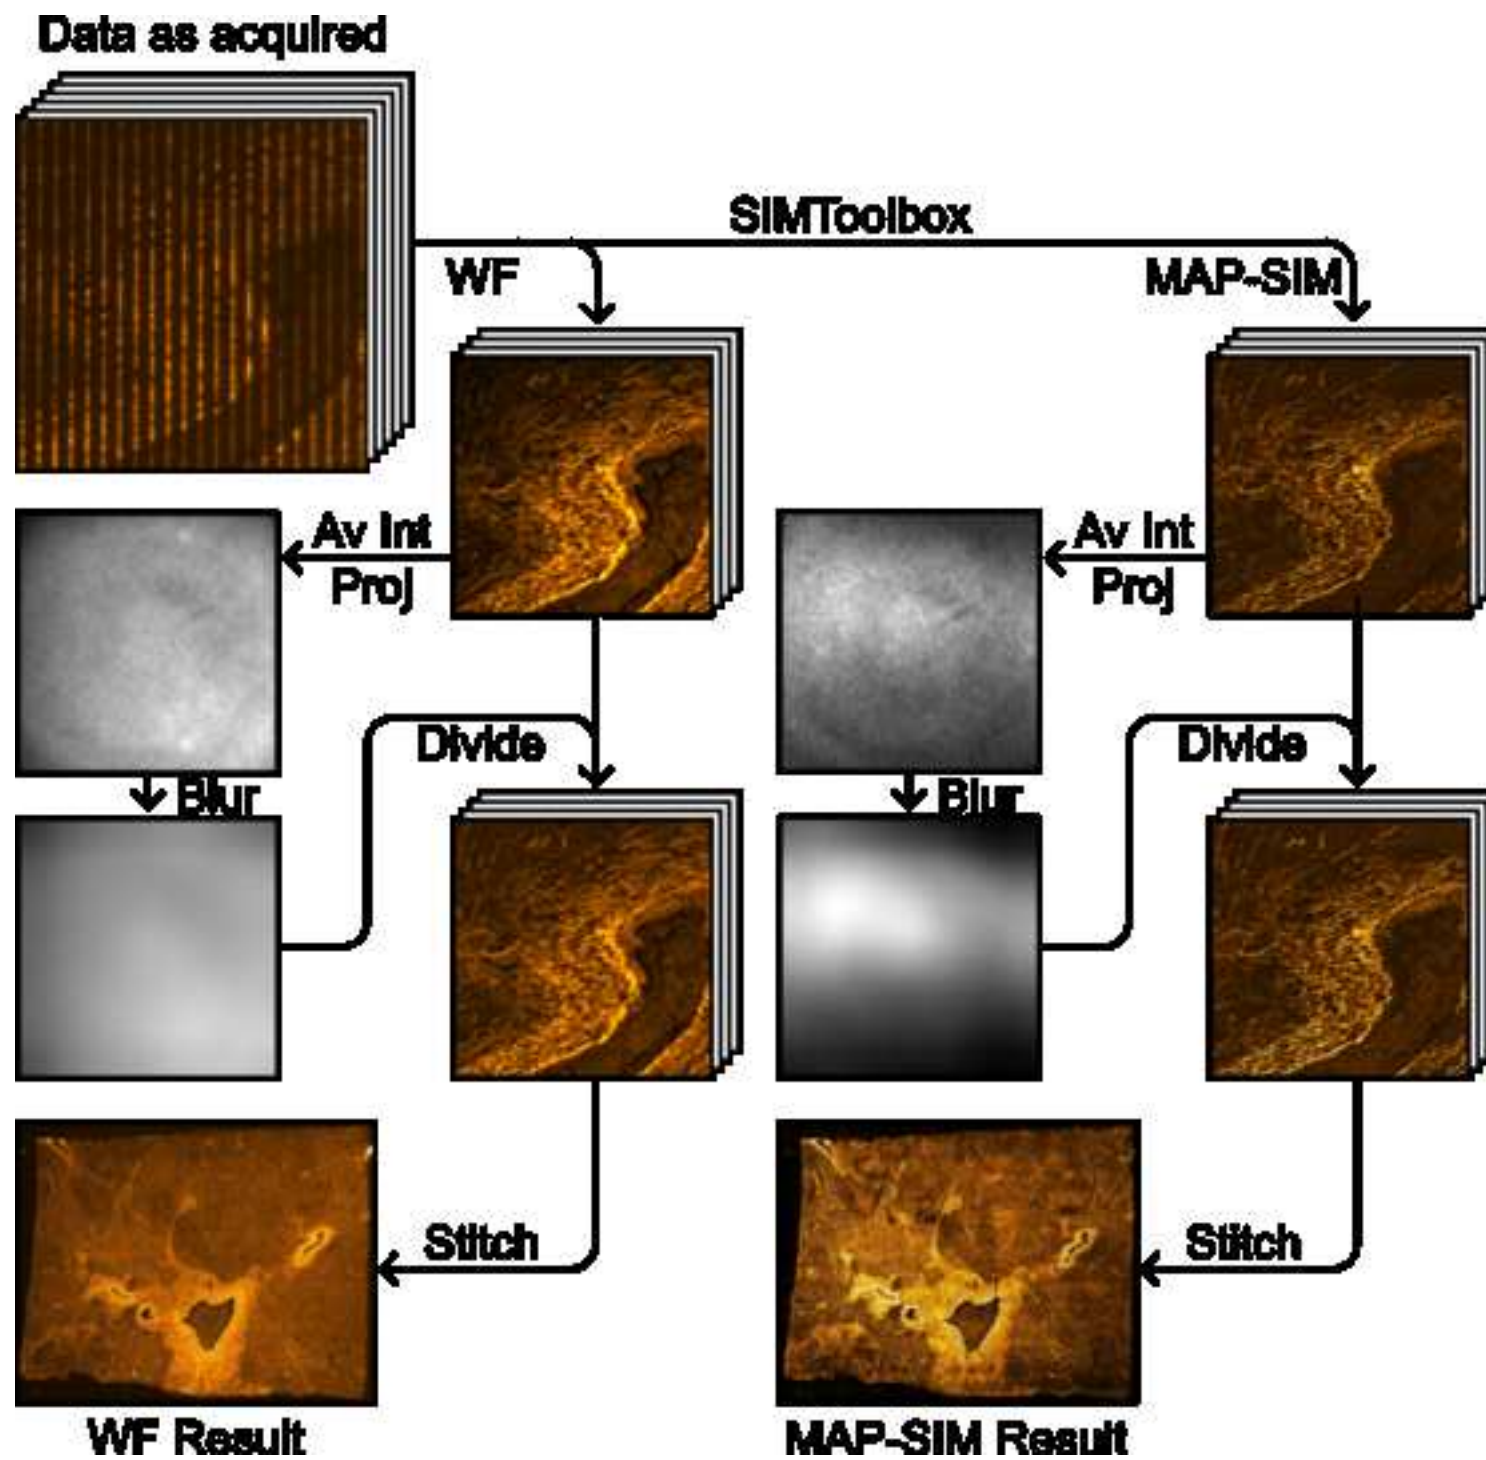

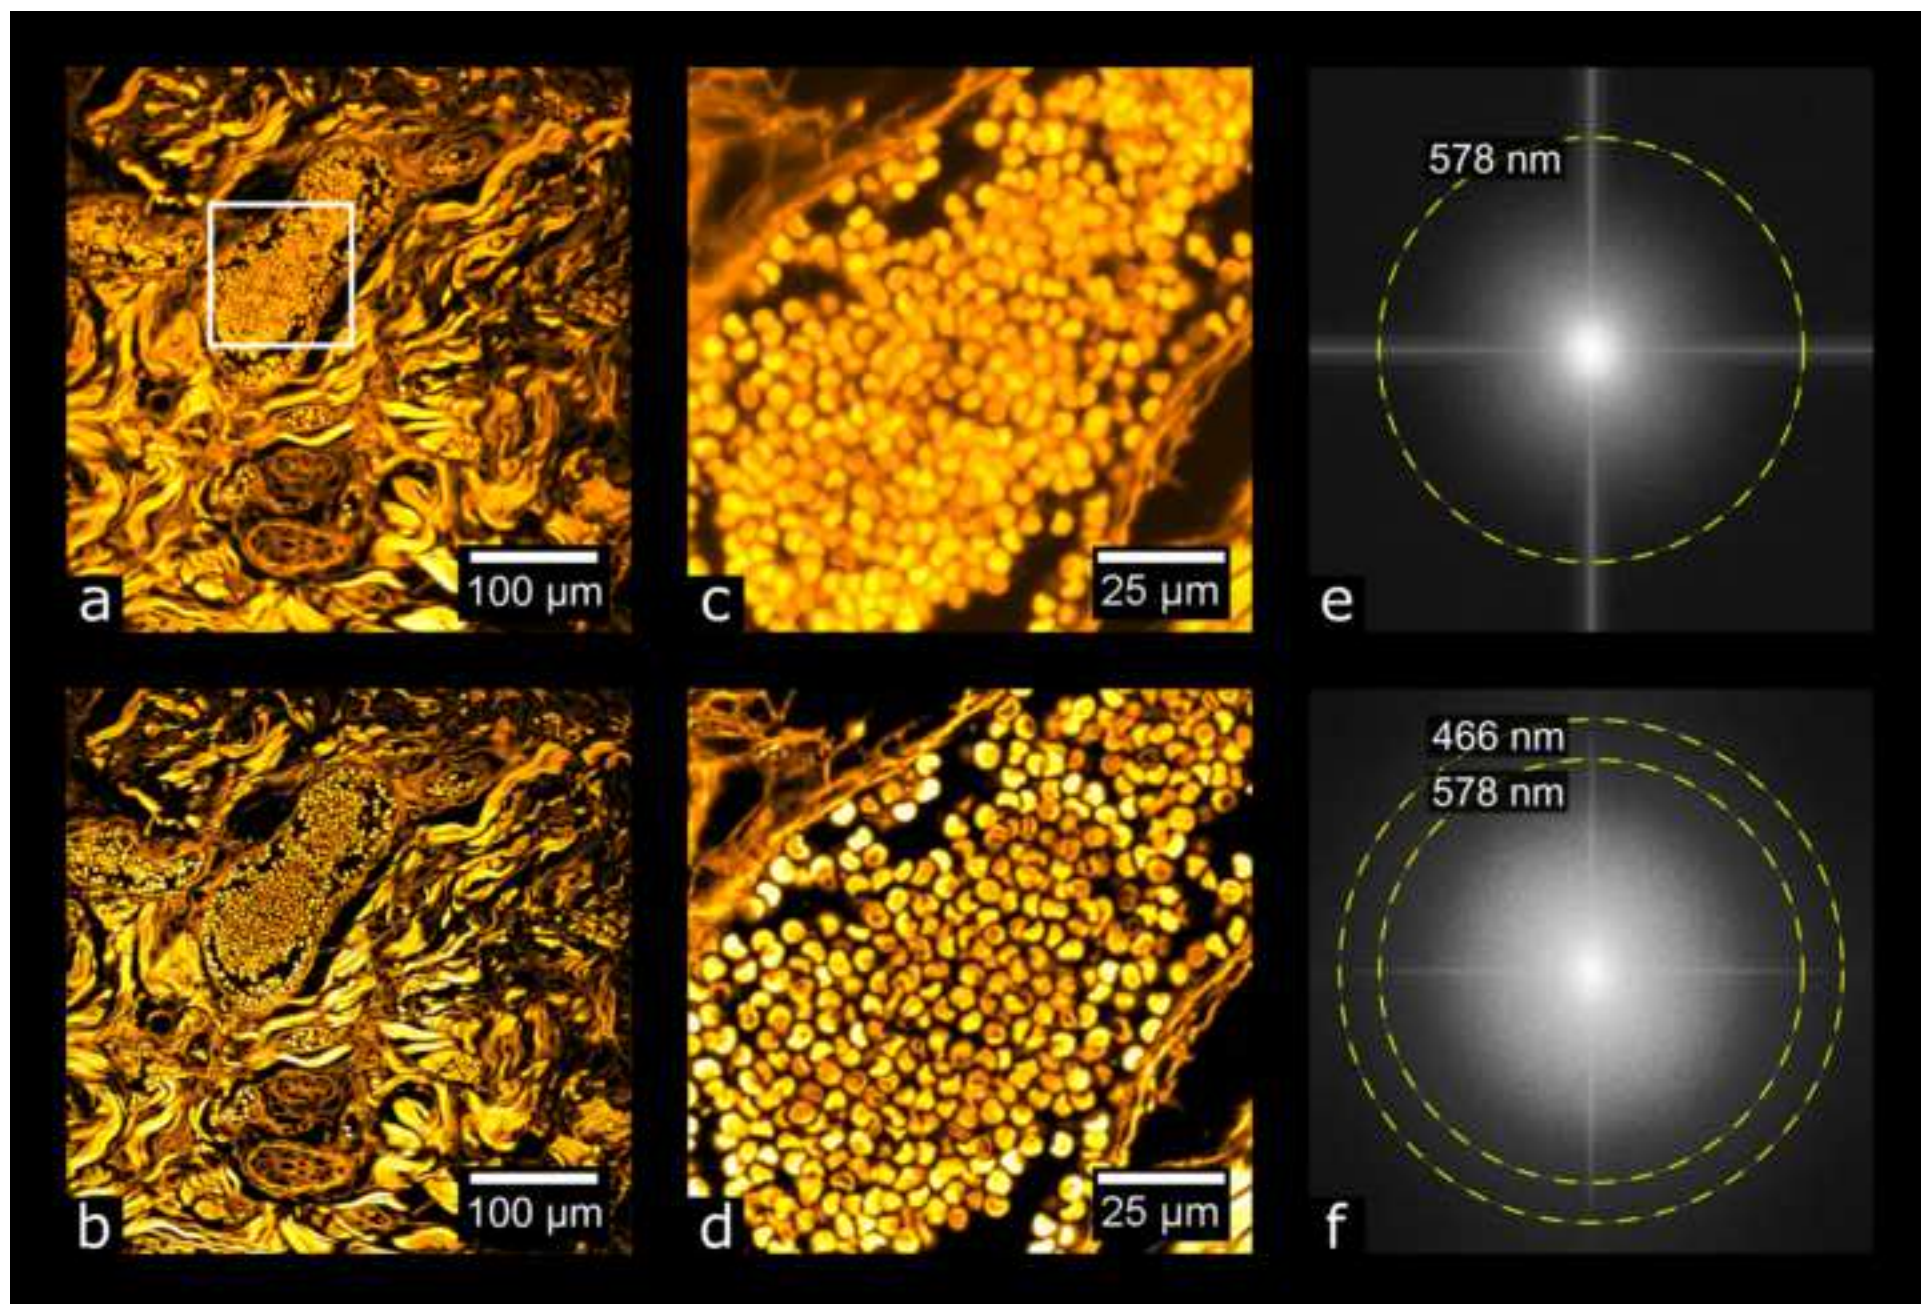

Figure 5

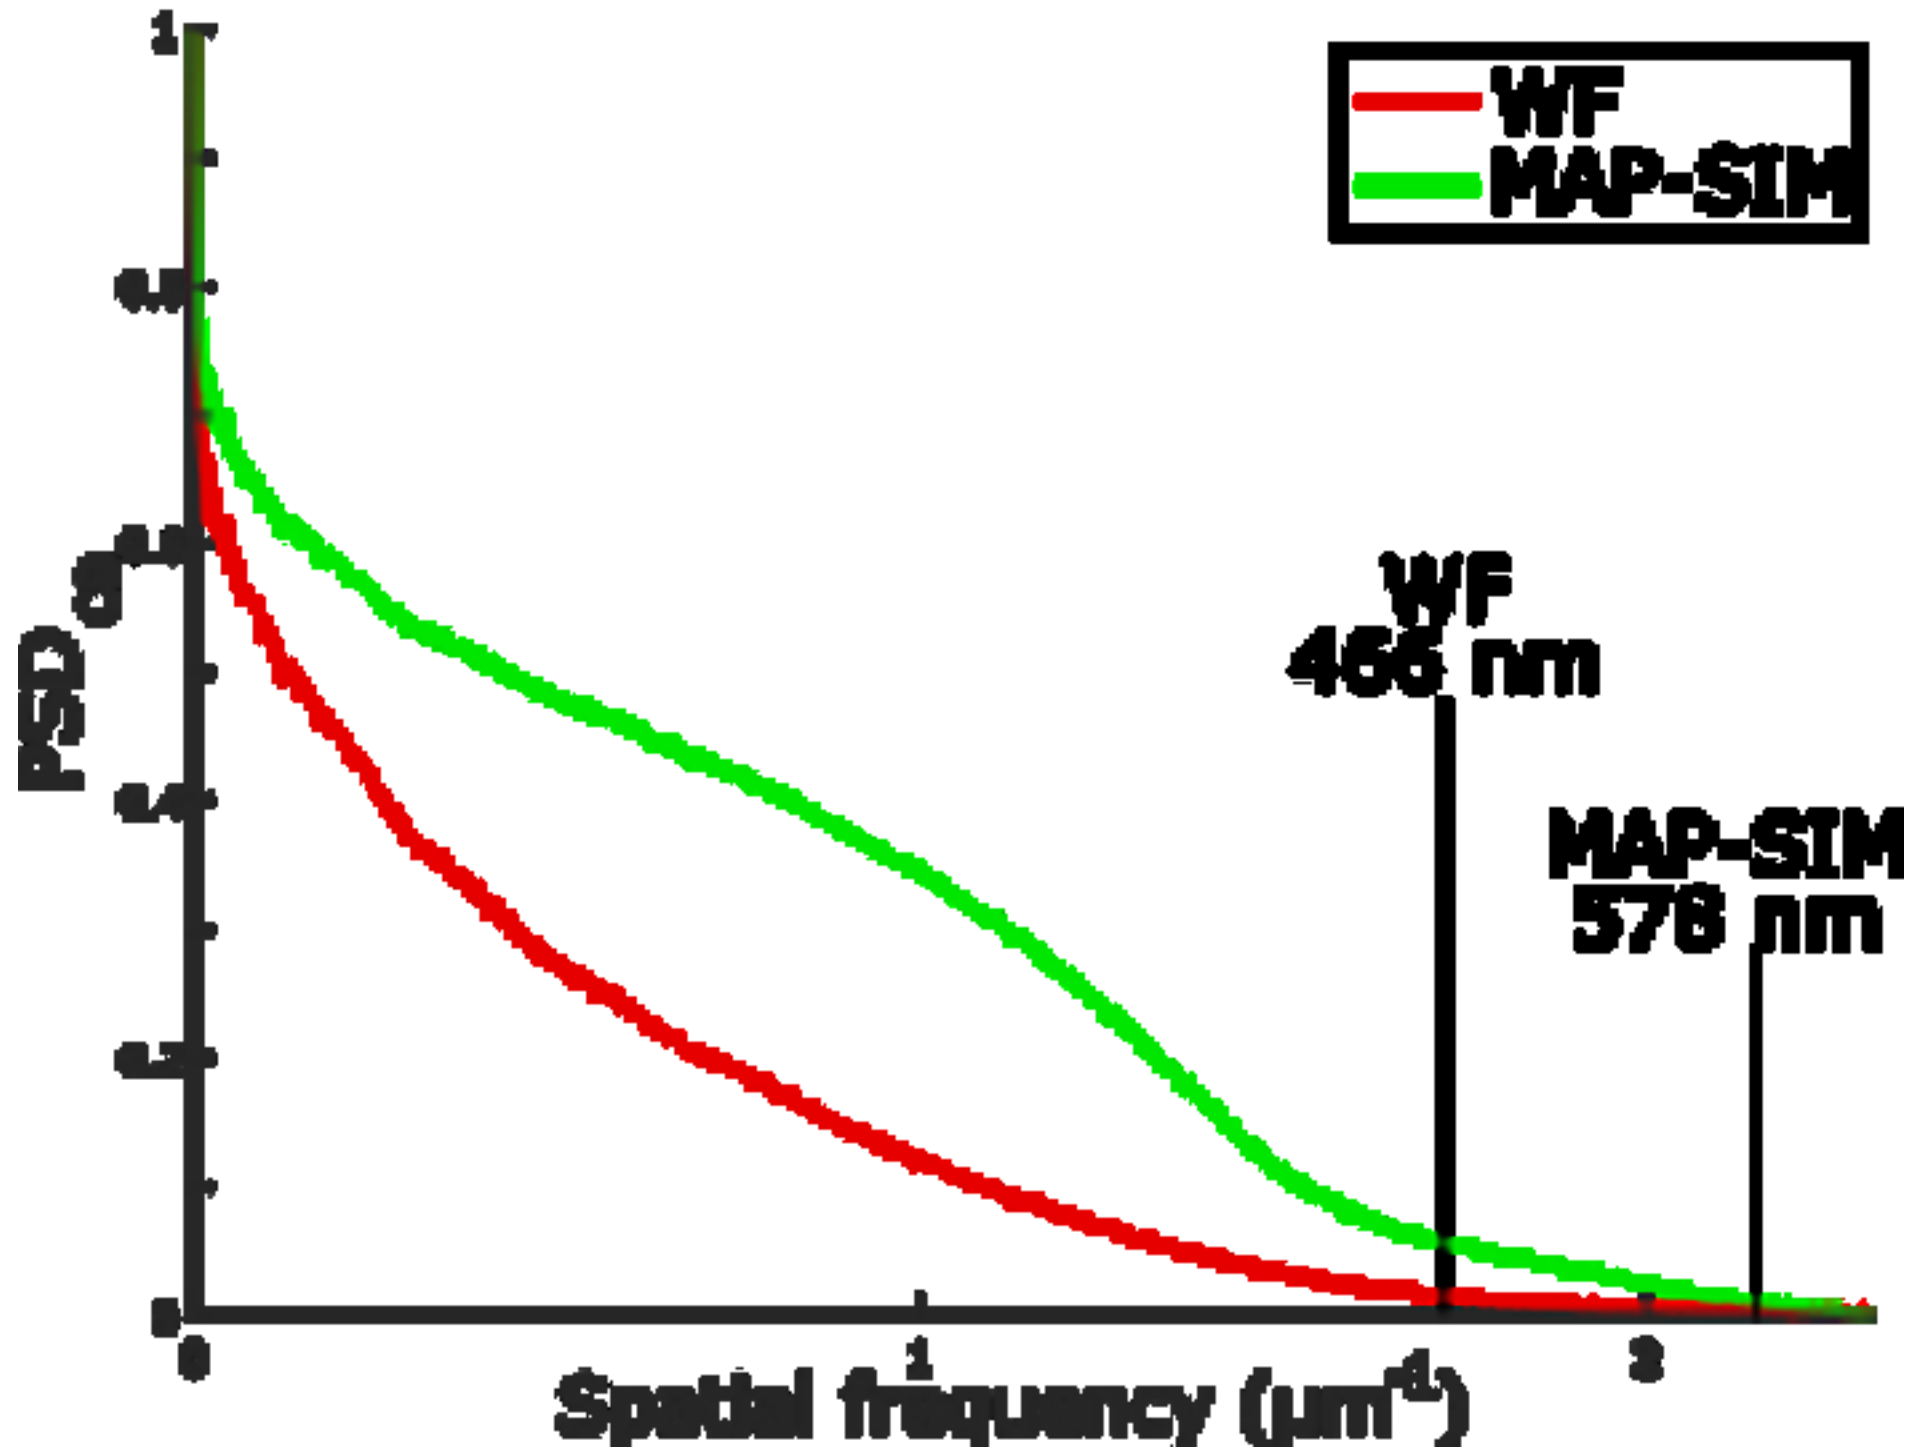



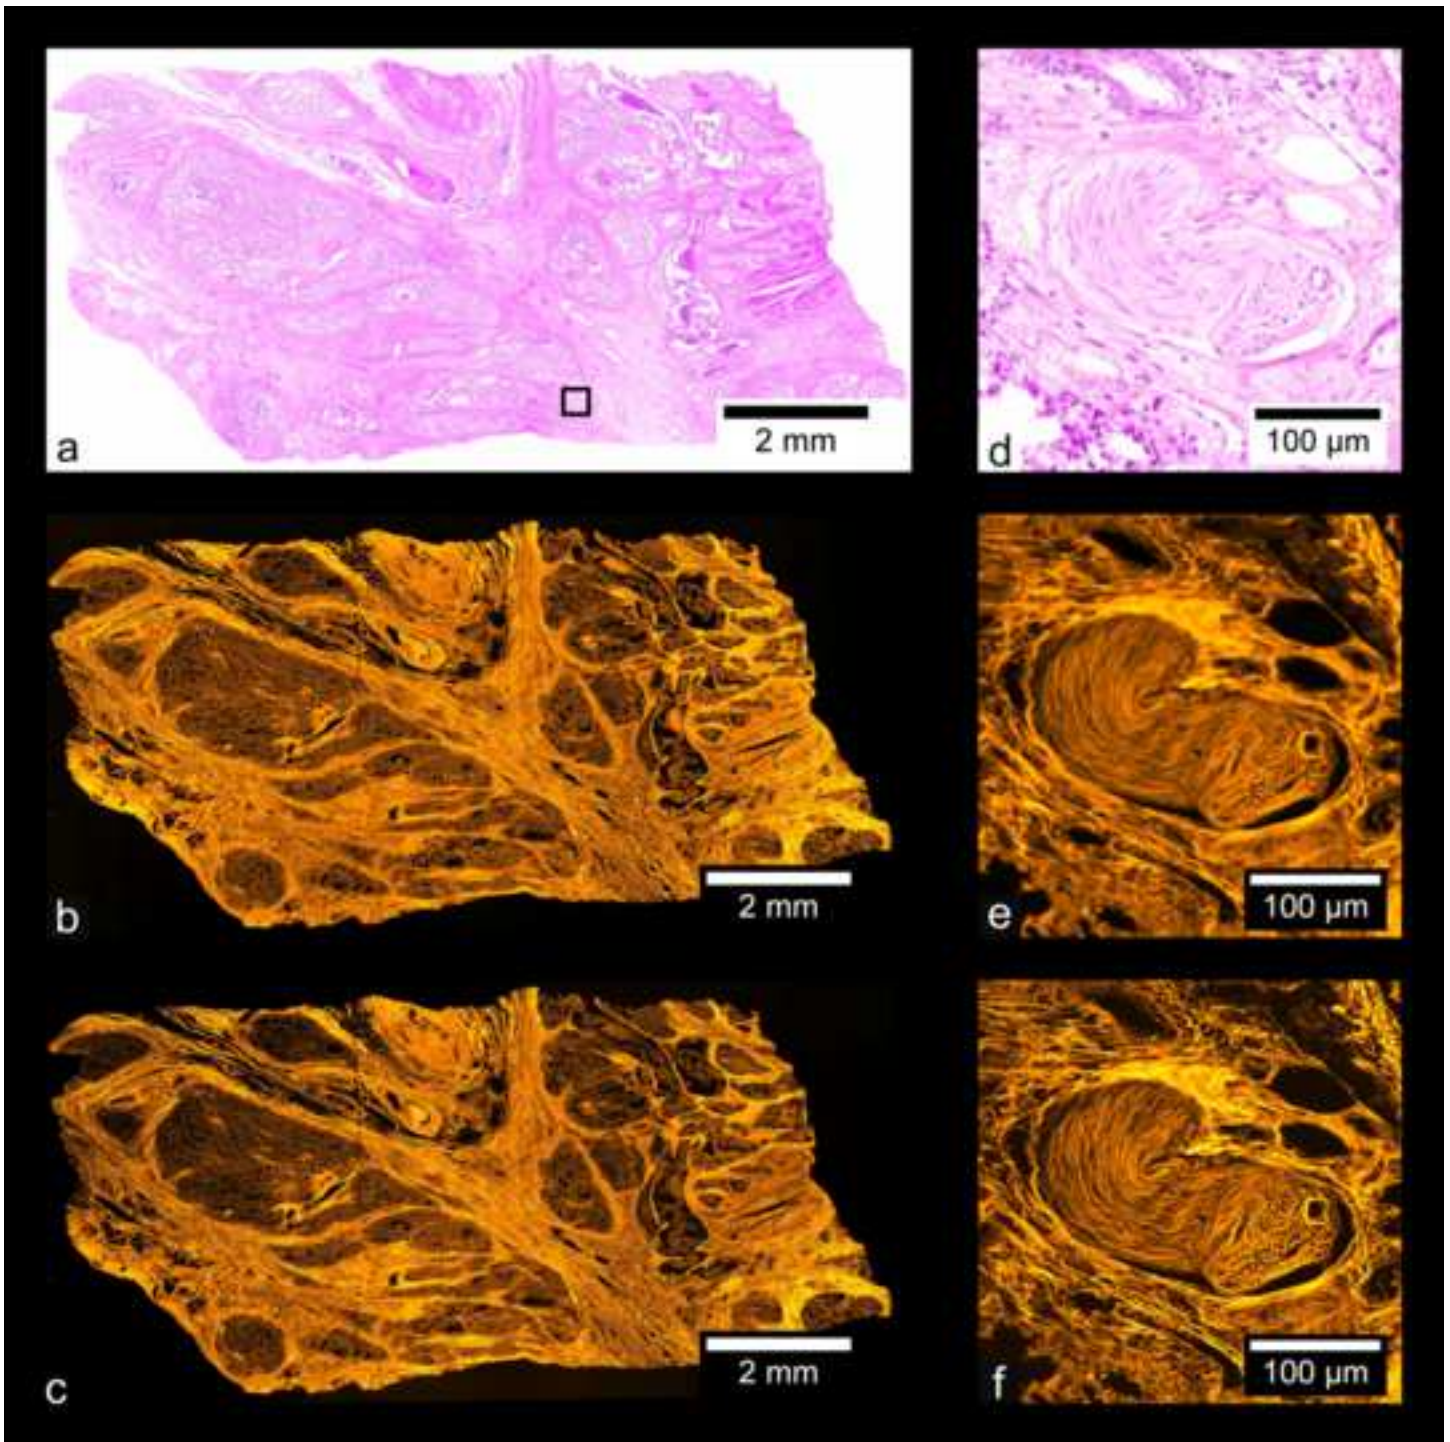

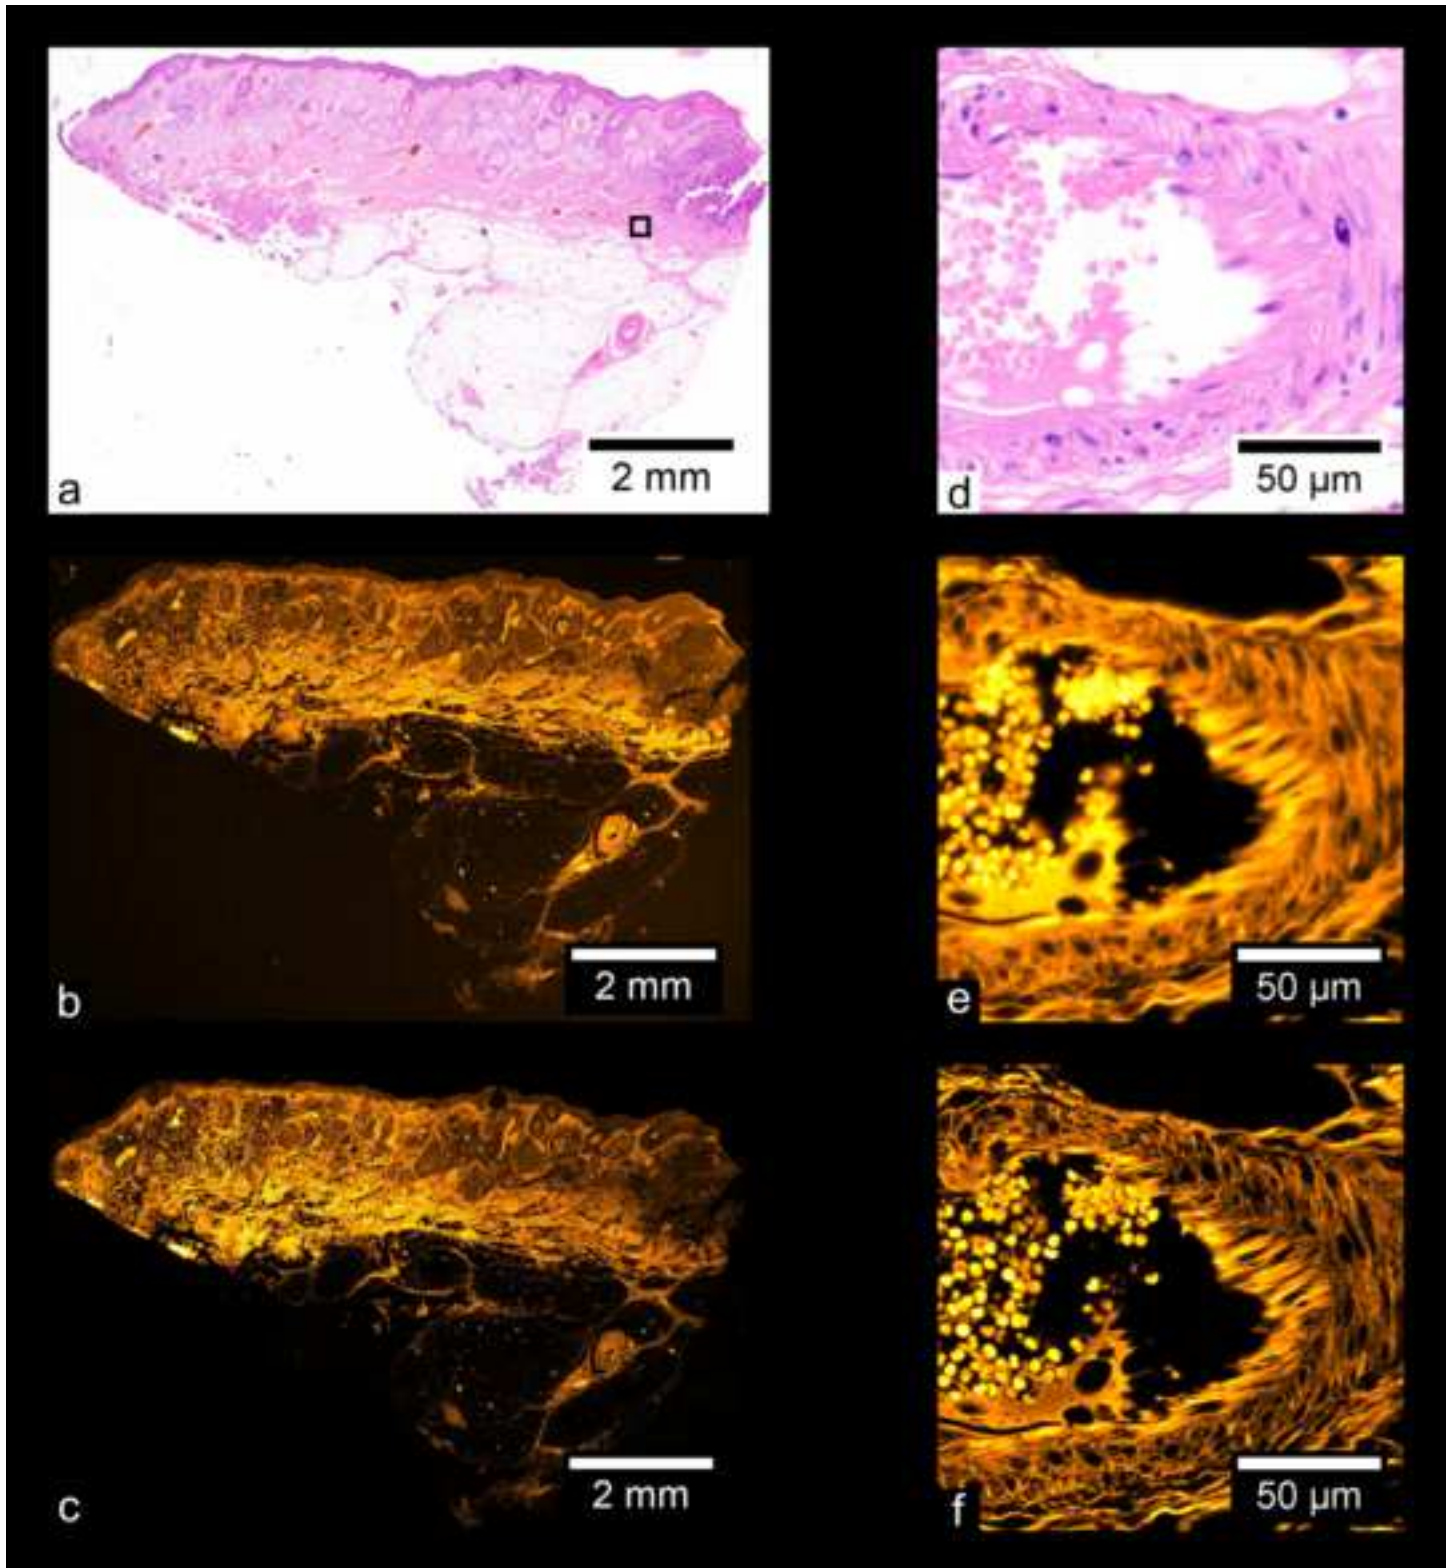

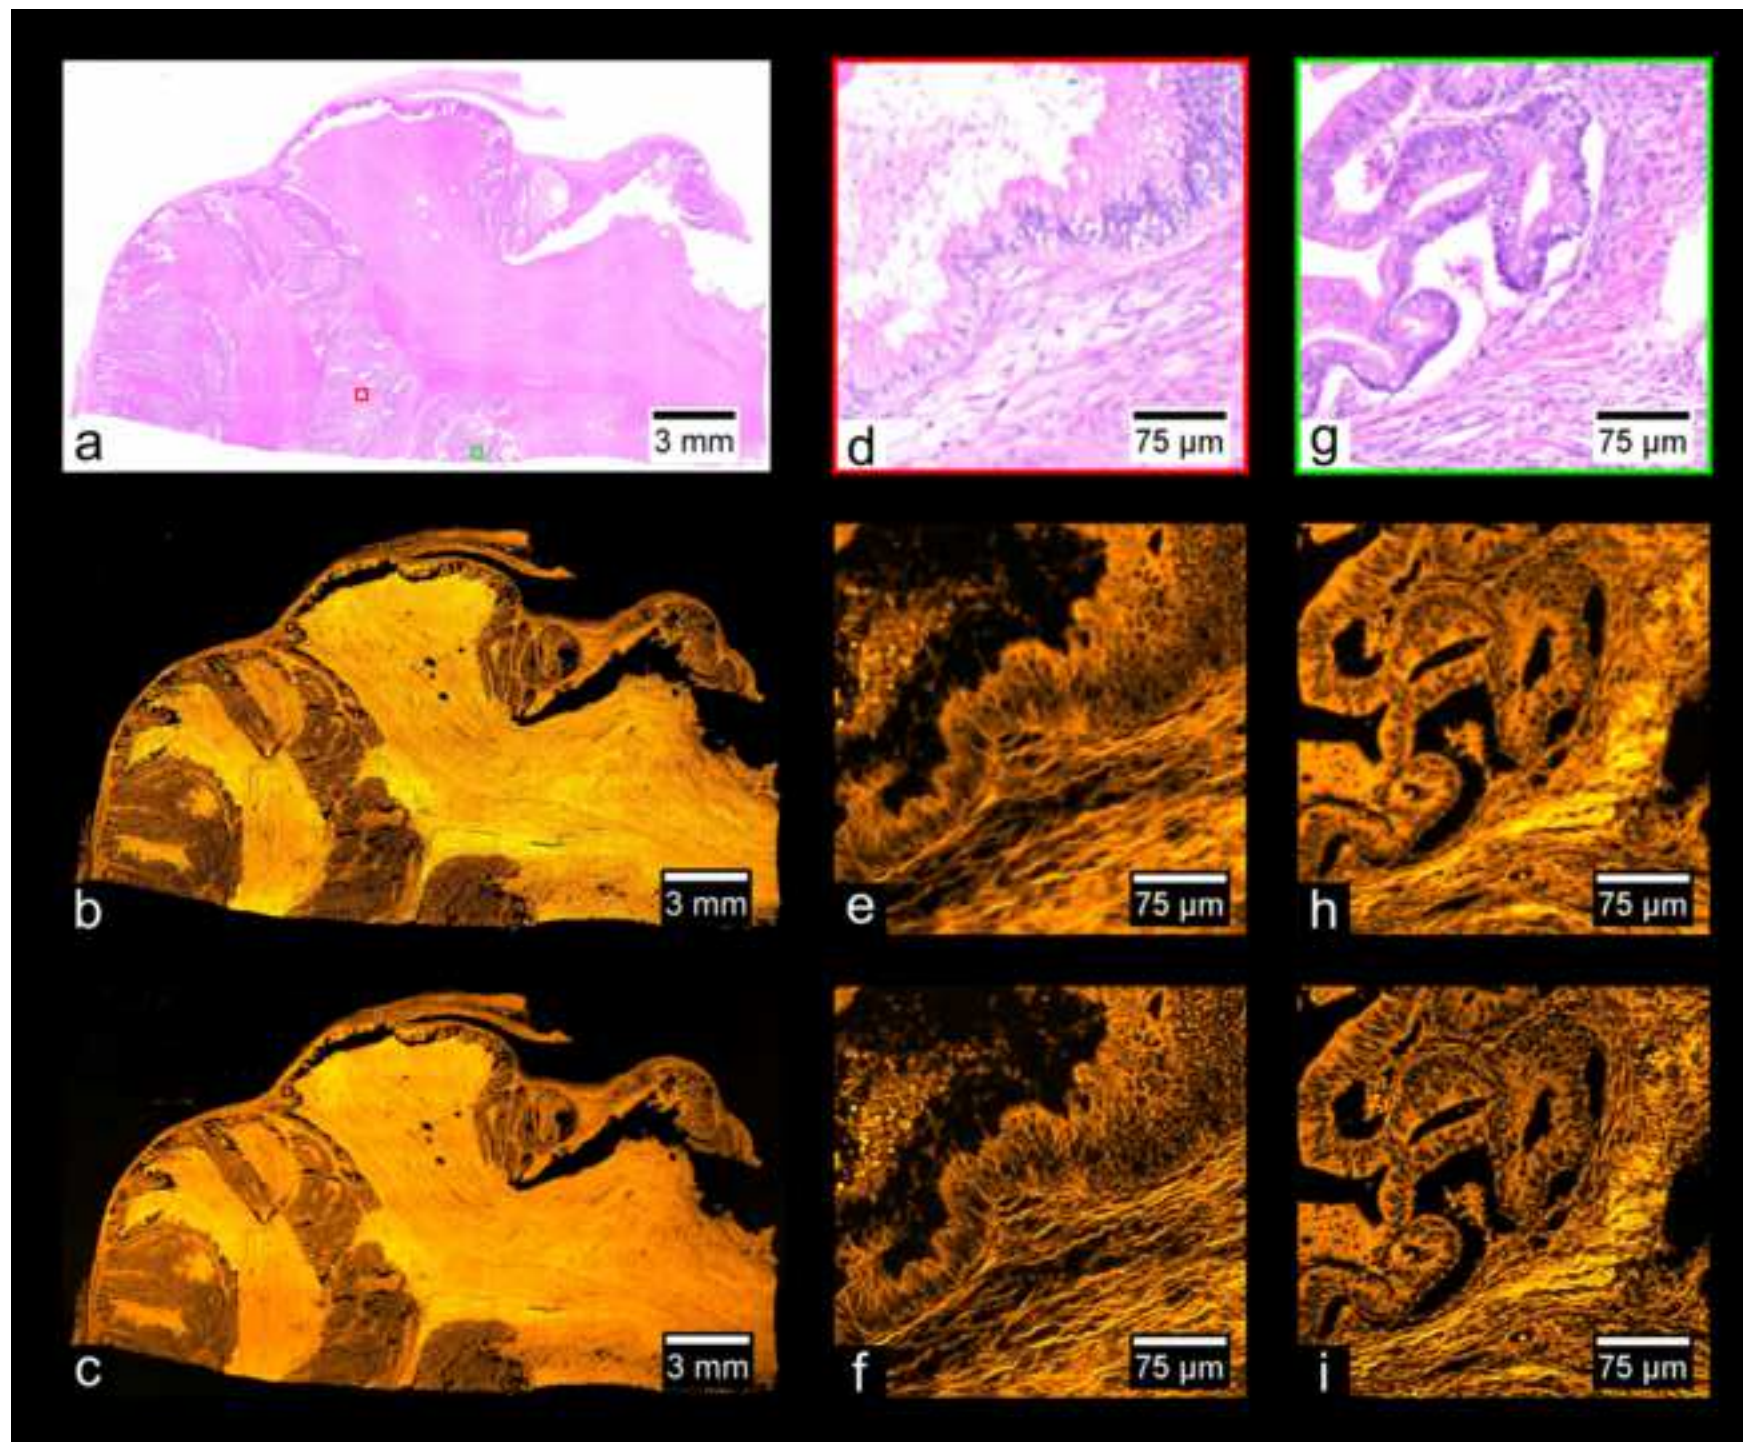

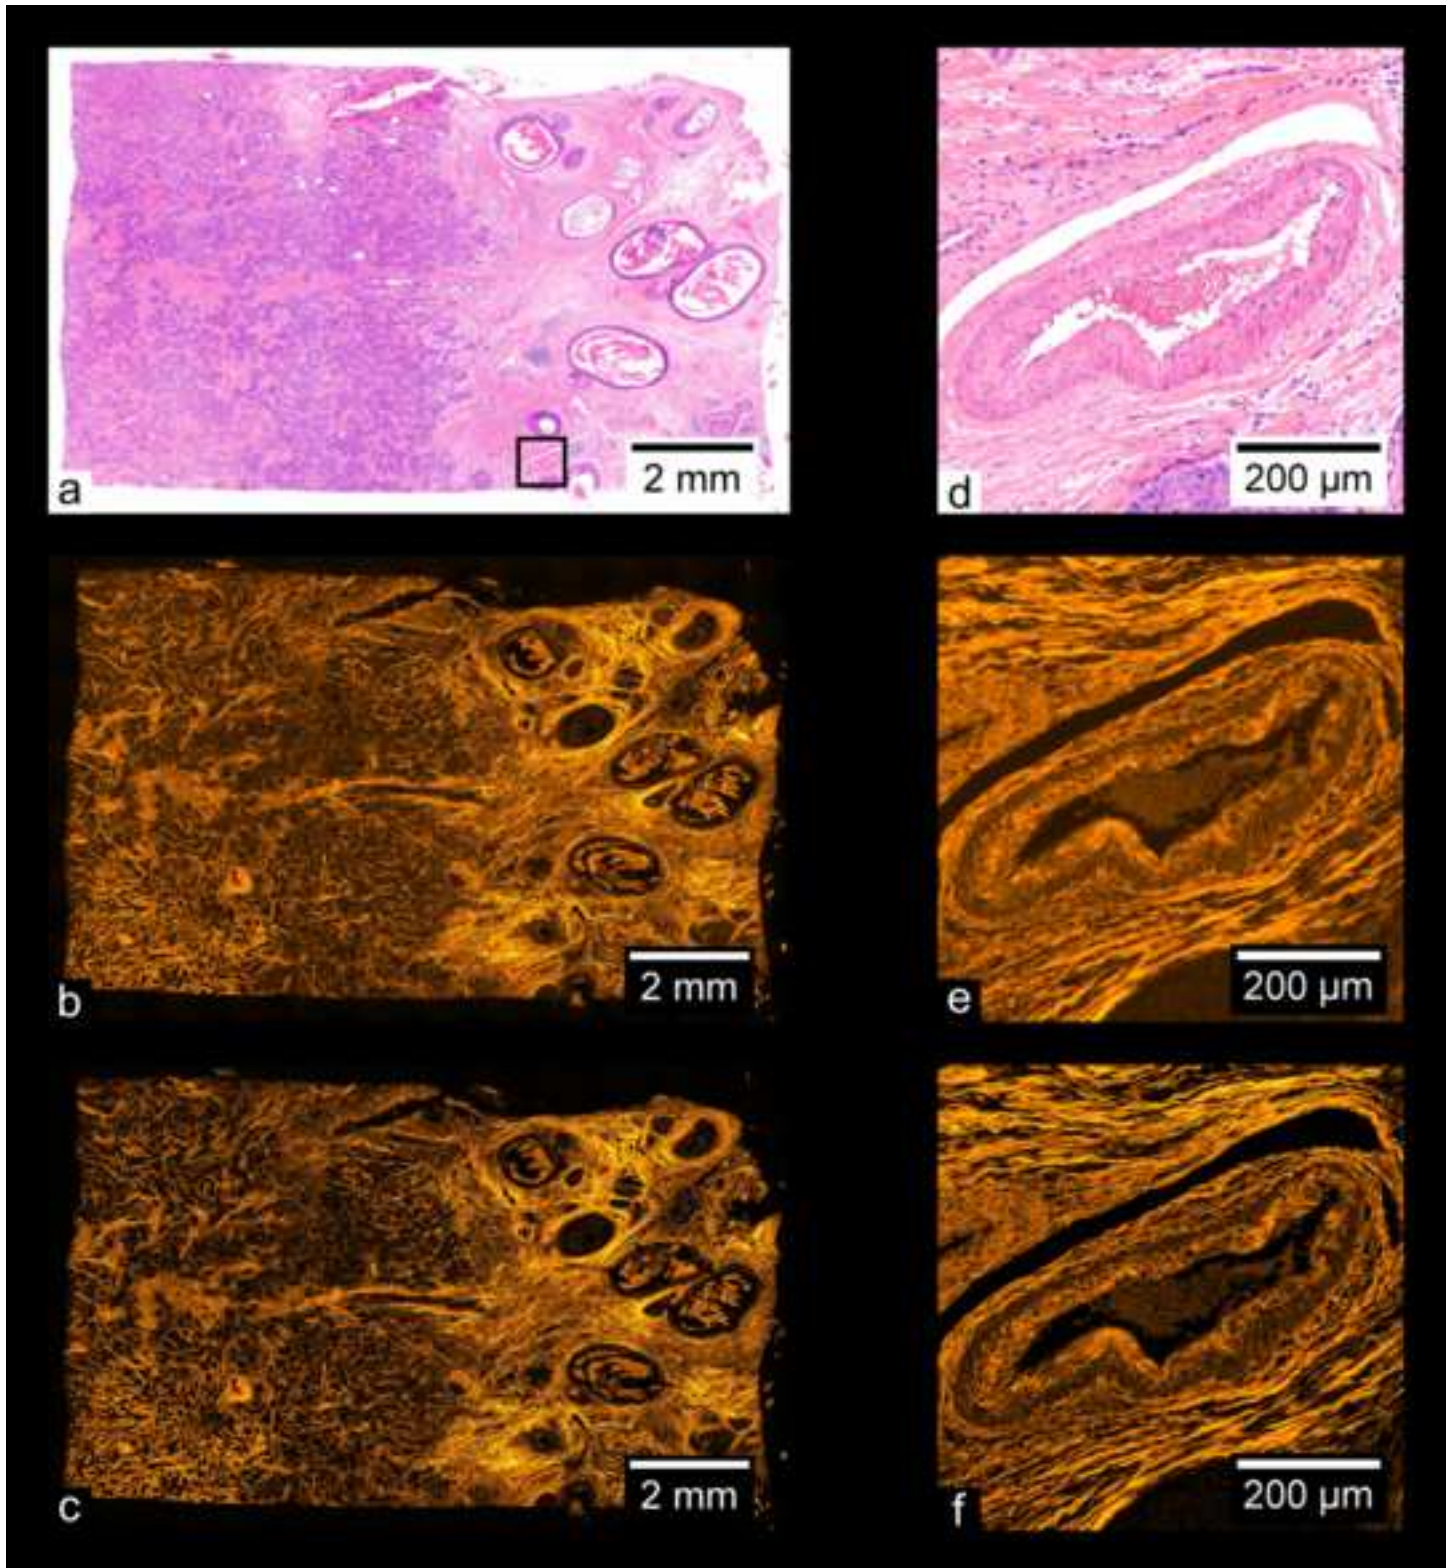

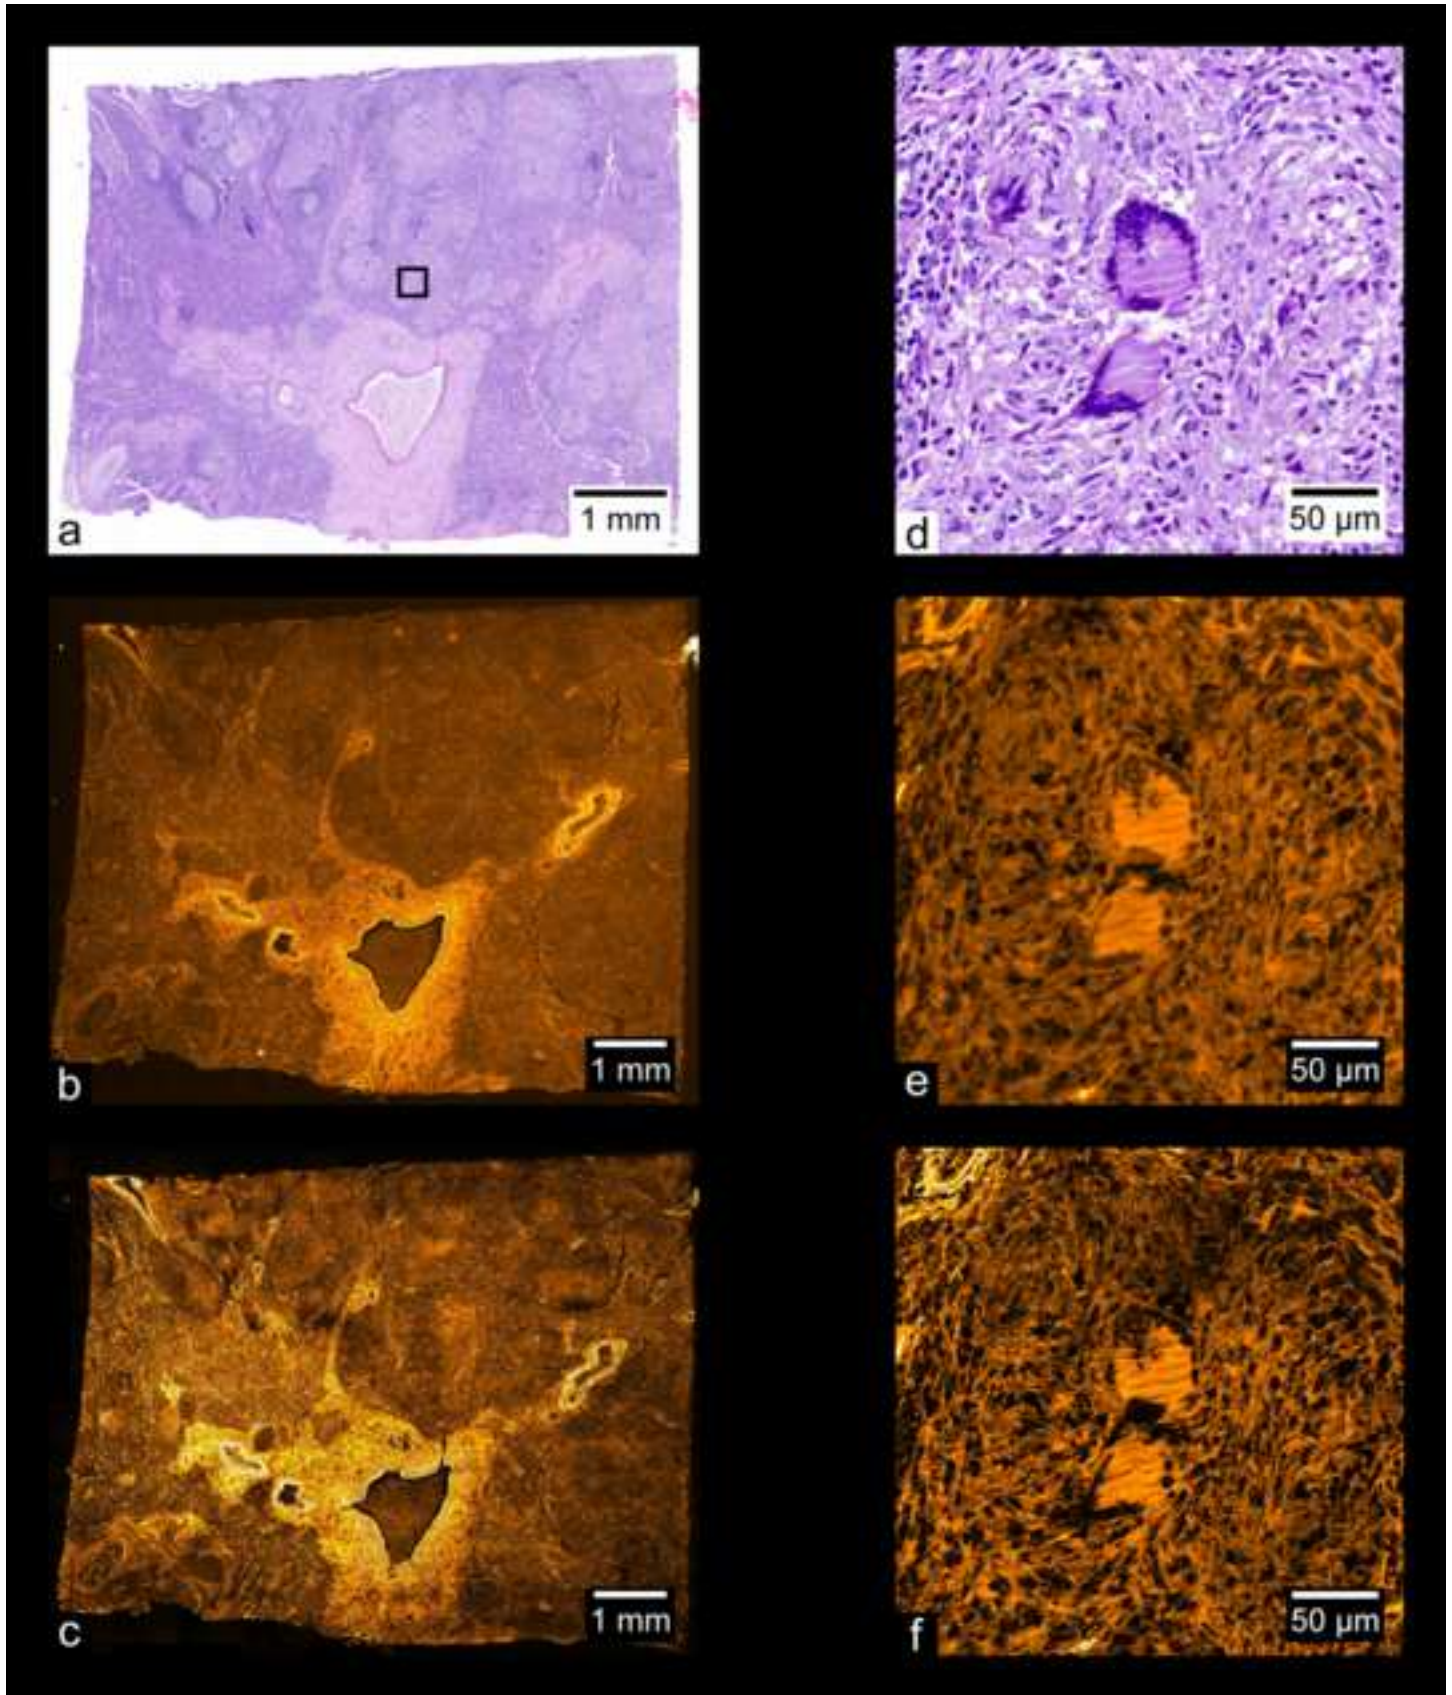



Click here to access/download  
**Supplementary Material**  
Supplement.docx



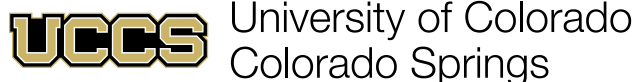**Dr. Guy M. Hagen**

Biofrontiers

1420 Austin Bluffs Pkwy.

Colorado Springs, CO 80918

Tel. 719-255-3692

[ghagen@uccs.edu](mailto:ghagen@uccs.edu)

Dear Editor:

We would like to submit a manuscript entitled “Artifact-free whole-slide imaging with structured illumination microscopy and Bayesian image reconstruction” for consideration in *GigaScience* as a data note.

Fluorescence microscopy is finding increased use in histopathology. Structured illumination microscopy (SIM) is a method which can produce fluorescence images with optical sectioning (similar to confocal microscopy), and/or with super-resolution. Methods in which a larger sample is imaged with subsequent stitching of image tiles is a popular approach, but previously published data often contains noticeable artifacts due to image stitching. This is often visible as dark bands surrounding each sub-image of a larger mosaic. Other artifacts can arise due to SIM methods as they are typically applied.

Here, we present datasets which do not contain such artifacts and the detailed methods we developed to produce them. We imaged human tissues under pathophysiological conditions, including cancers of the prostate, breast, skin, and ovary. The samples we used were acquired commercially (for example from Carolina Biological) and are standard histological preparations.

We plan to upload our datasets to the Giga-database after an invitation to do so from the Journal. These datasets include the un-stitched image tiles, as well as high quality, high resolution images of the samples after de-vignetting and stitching. These datasets will be useful for other researchers investigating SIM methods or image stitching approaches, and also for clinicians who are interested in fluorescence-based histopathology. These datasets can be rather large, which has prevented their publication up to now. We believe *GigaScience* offers an excellent venue for such publication.

We would like to suggest the following reviewers for the manuscript:

Dr. Daniel Sage

Biomedical Imaging Laboratory

École polytechnique fédérale de Lausanne

Lausanne, Switzerland

[daniel.sage@epfl.ch](mailto:daniel.sage@epfl.ch)

Dr. Chris Armit

Data Scientist

Gigascience

Dr. Pavel Matula

Vice Dean, Faculty of informatics

Masaryk University

Brno, Czech Republic

[pam@fi.muni.cz](mailto:pam@fi.muni.cz)

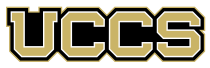

University of Colorado  
Colorado Springs

**Dr. Guy M. Hagen**

Biofrontiers

1420 Austin Bluffs Pkwy.

Colorado Springs, CO 80918

Tel. 719-255-3692

ghagen@uccs.edu

Dr. Daniel Gareau  
Laboratory for Investigative Dermatology  
The Rockefeller University  
New York, NY, USA  
[dgareau@rockefeller.edu](mailto:dgareau@rockefeller.edu)

Sincerely,

A handwritten signature in blue ink that reads "Guy Hagen" with a long, sweeping horizontal line extending to the right.

Guy M. Hagen
